# Supplementary material for: Novel pyrazoline linked acyl thiourea pharmacophores as antimicrobial, urease, amylase and α-glucosidase inhibitors: design, synthesis, SAR and molecular docking studies
Source: Royal Society of Chemistry journal article supplement (doi:10.1039/d3ra06812a), 2024-01-01
Supplement: d3ra06812a1.pdf [file d3ra06812a1.pdf]

## **Novel Pyrazoline linked acyl thiourea pharmacophores: Design synthesis, antimicrobial, urease, amylase and $\alpha$ -glucosidase inhibition, SAR and molecular docking study.**

Aamer Saeed<sup>a</sup> Atteeque Ahmed<sup>a</sup> Main Bilal Haider<sup>a</sup>, Hammad Ismail<sup>b</sup> Khizar Hayat<sup>c</sup>, Ghulam Shabir<sup>a</sup>, Hesham R El-Seedi<sup>de</sup>

<sup>a</sup> Department of Chemistry, Quaid I Azam University, Islamabad, 45320, Pakistan.

<sup>b</sup> Department of Biochemistry and Biotechnology, University of Gujrat, Gujrat, 50700, Pakistan

<sup>c</sup> Department of Botany, University of Gujrat, Gujrat, 50700, Pakistan

<sup>d</sup> International Research Centre for Food Nutrition and Safety, Jiangsu University, Zhenjiang 212013, China.

<sup>e</sup> Department of Chemistry, Faculty of Science, Islamic University of Madinah, Madinah, 42351, Saudi Arabia

### **Correspondence**

Prof. Dr. Aamer Saeed

Email: [asaheed@qau.edu.pk](mailto:asaheed@qau.edu.pk); ORCID: <http://orcid.org/0000-0002-7112-9296>

Contact number: +92-51-9064-2128, Fax: +92-51-9064-2241

List of all spectra:

1. **Figure 1.** <sup>1</sup>H-NMR Spectrum of **5a**
2. **Figure 2.** <sup>13</sup>C-NMR Spectrum of **5a**
3. **Figure 3.** FT-IR Spectrum of **5a**
4. **Figure 4.** <sup>1</sup>H-NMR Spectrum of **5d**
5. **Figure 5.** <sup>13</sup>C-NMR Spectrum of **5d**
6. **Figure 6.** FT-IR Spectrum of **5d**
7. **Figure 7.** <sup>1</sup>H-NMR Spectrum of **5e**
8. **Figure 8.** <sup>13</sup>C-NMR Spectrum of **5e**
9. **Figure 9.** FT-IR Spectrum of **5e**
10. **Figure 10.** <sup>1</sup>H-NMR Spectrum **5f**
11. **Figure 11.** <sup>1</sup>H-NMR Spectrum **5i**
12. **Figure 12.** <sup>13</sup>C-NMR Spectrum **5i**

13. **Figure 13.** FT-IR Spectrum of **5j**
14. **Figure 14.**  $^1\text{H}$ -NMR Spectrum **5k**
15. **Figure 15.**  $^{13}\text{C}$ -NMR Spectrum **5k**
16. **Figure 16.** FT-IR Spectrum of **5k**
17. **Figure 17.** FT-IR Spectrum of **5m**
18. **Figure 18.** Amylase interaction images of compounds
19. **Figure 19.** Glucosidase interaction images of compounds
20. **Figure 20.** Urease interaction images of compounds

**Figure 1.**  $^1\text{H-NMR}$  Spectrum of **5a**

***N*-(3,5-bis(4-fluorophenyl)-4,5-dihydro-1*H*-pyrazole-1-carbonothioyl)-4-methyl-*N*-(4-methylbenzoyl)benzamide (**5a**):**

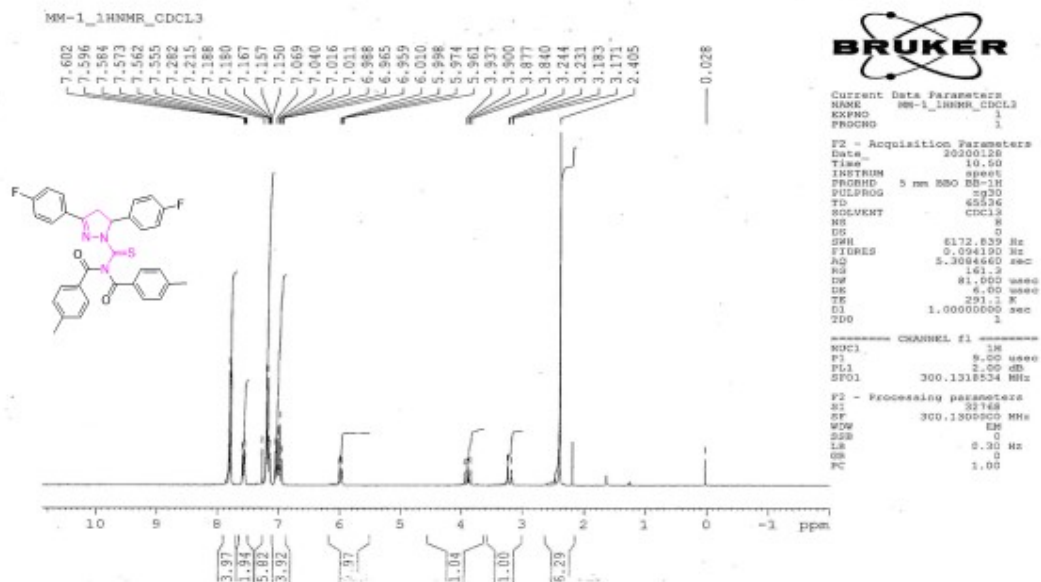

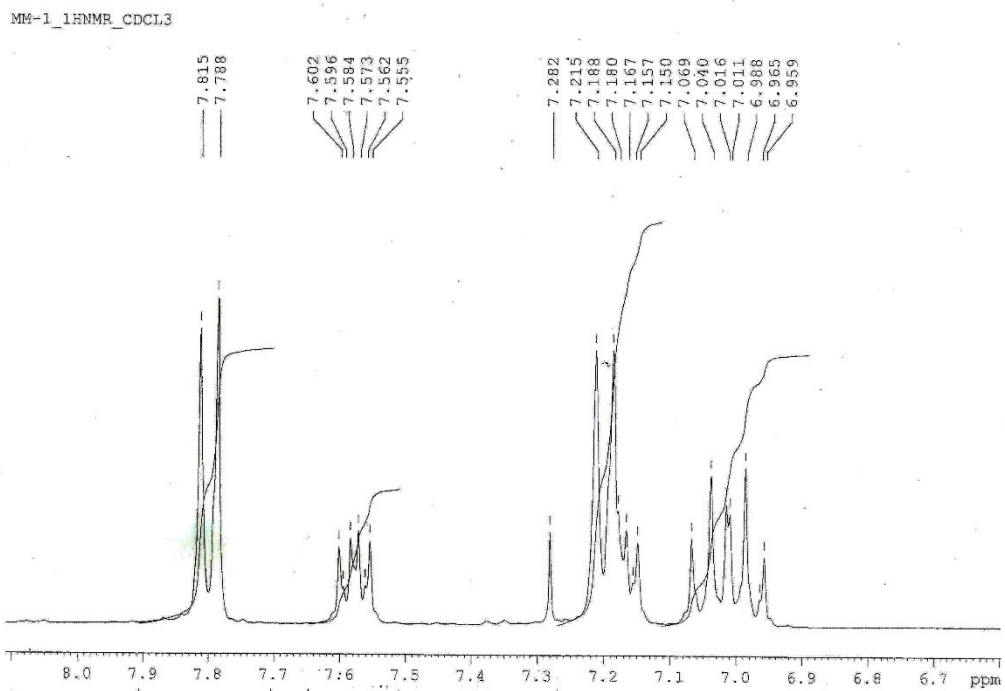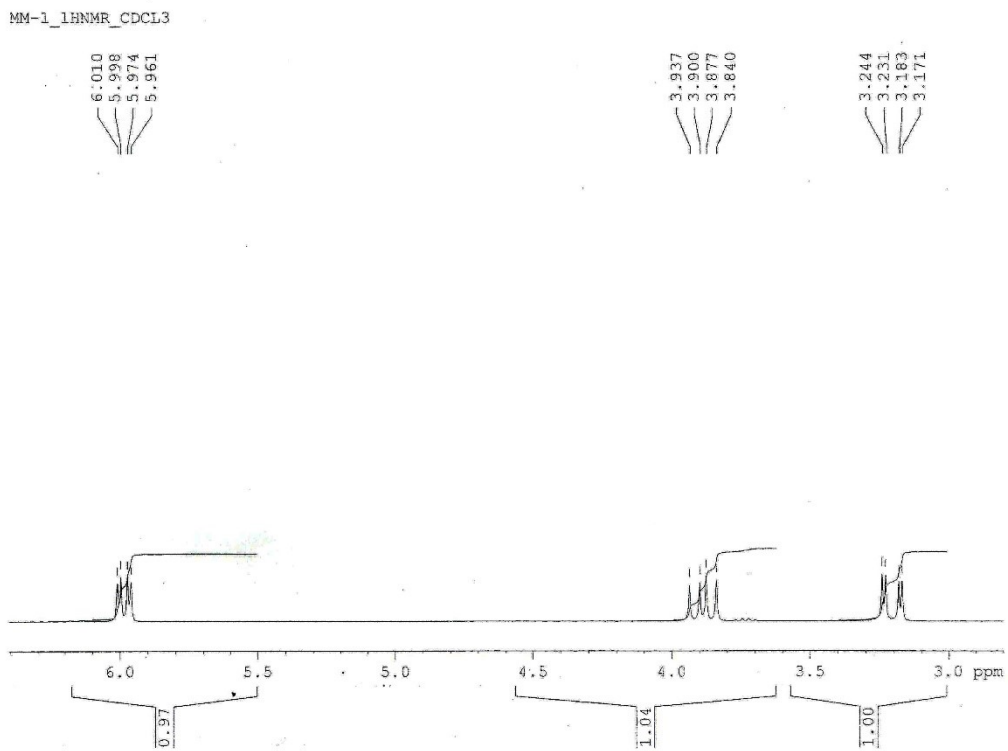

Figure 2.  $^{13}\text{C}$ -NMR Spectrum of 5a

***N*-(3,5-bis(4-fluorophenyl)-4,5-dihydro-1*H*-pyrazole-1-carbonothioyl)-4-methyl-*N*-(4-methylbenzoyl)benzamide (5a):**

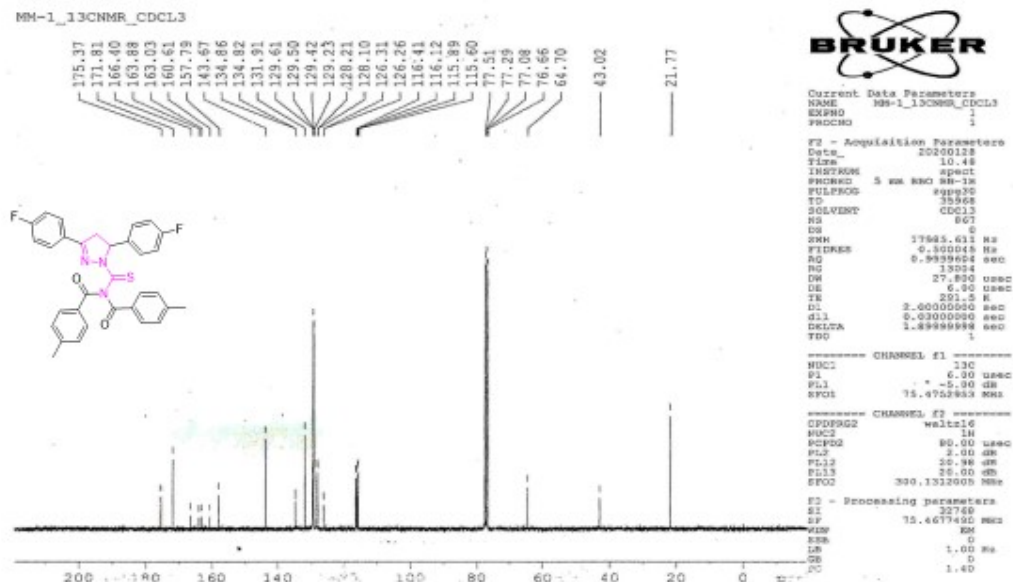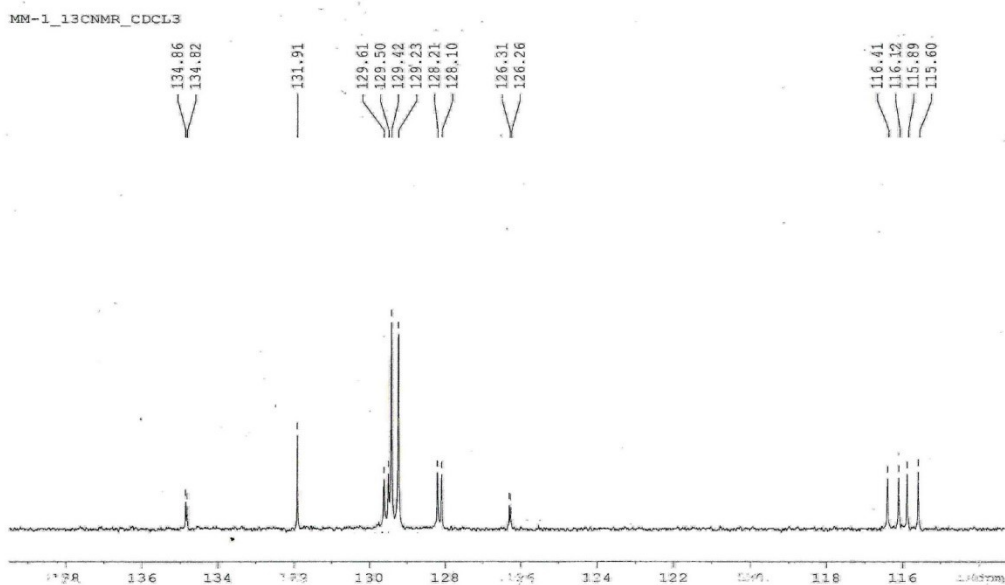

**Figure 3.** FT-IR Spectrum *N*-(3,5-bis(4-fluorophenyl)-4,5-dihydro-1*H*-pyrazole-1-carbonothioyl)-4-methyl-*N*-(4-methylbenzoyl)benzamide (5a):

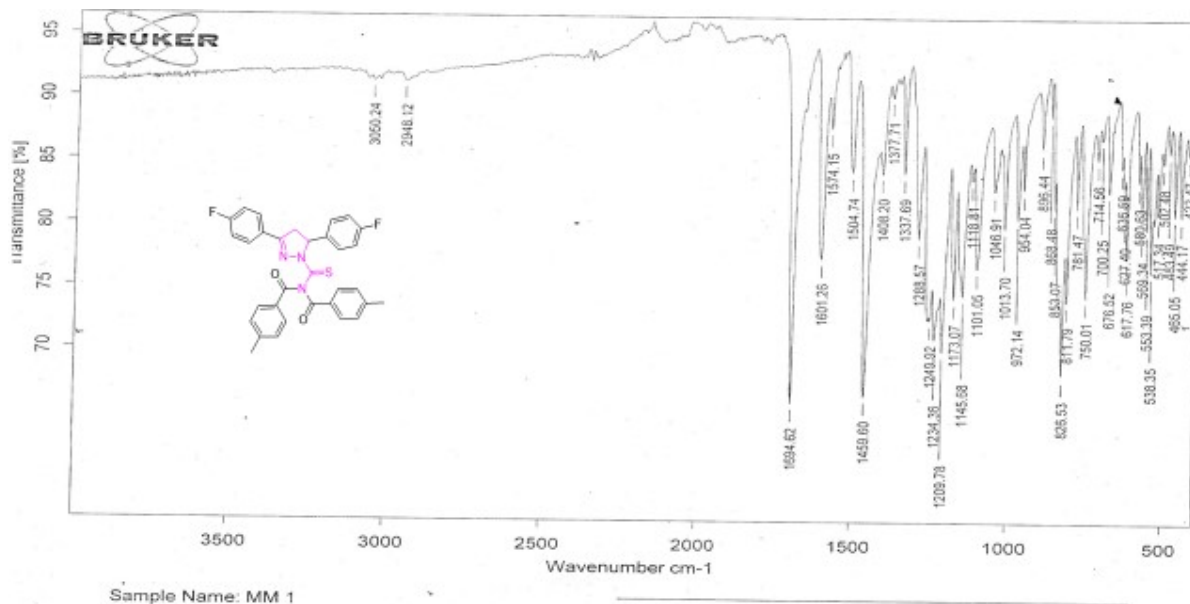

Figure 4. <sup>1</sup>H-NMR Spectrum of 5d

*N*-(5-(4-fluorophenyl)-3-phenyl-4,5-dihydro-1*H*-pyrazole-1-carbonothioyl)-4-methyl-*N*-(4-methylbenzoyl)benzamide (5d):

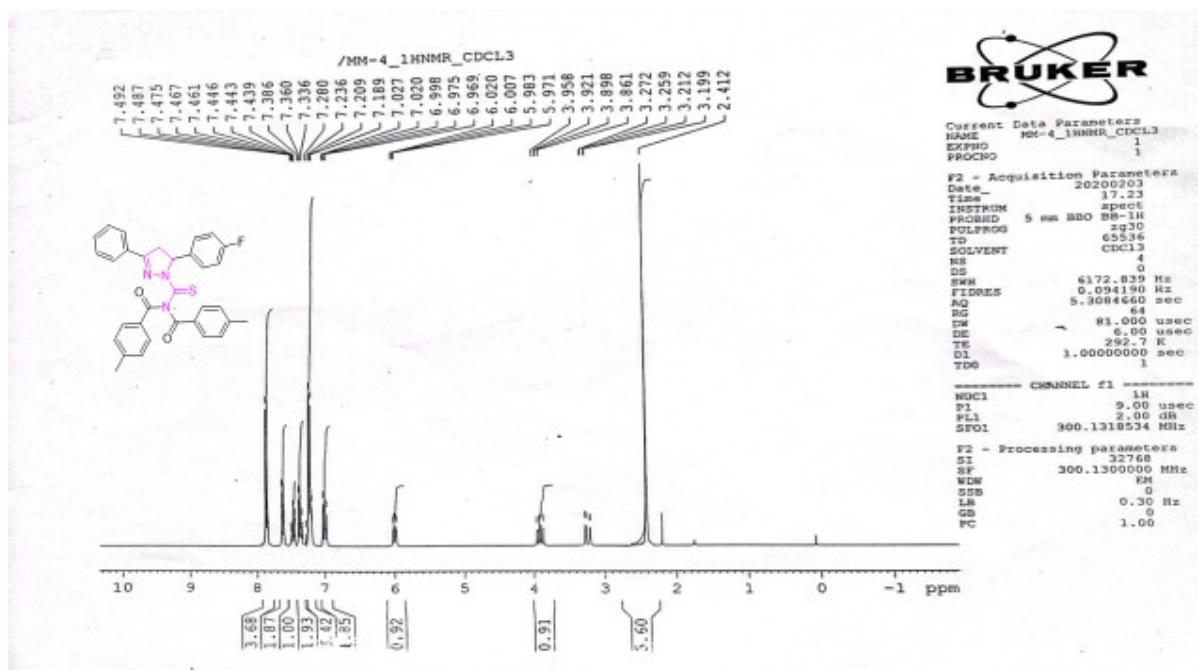

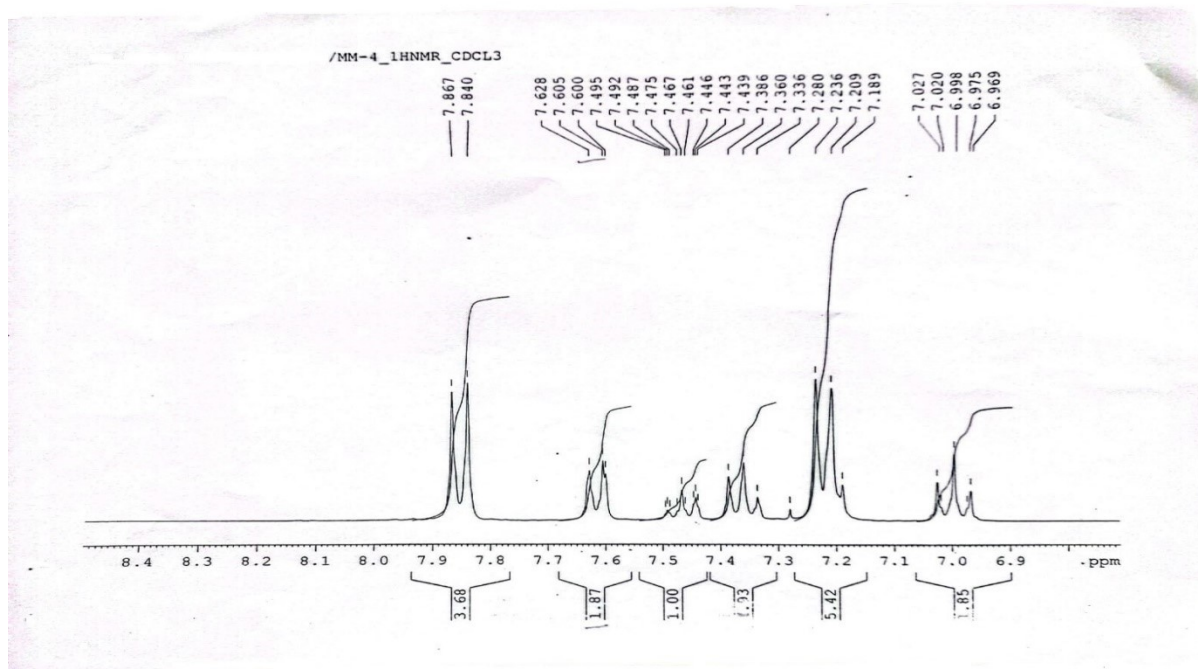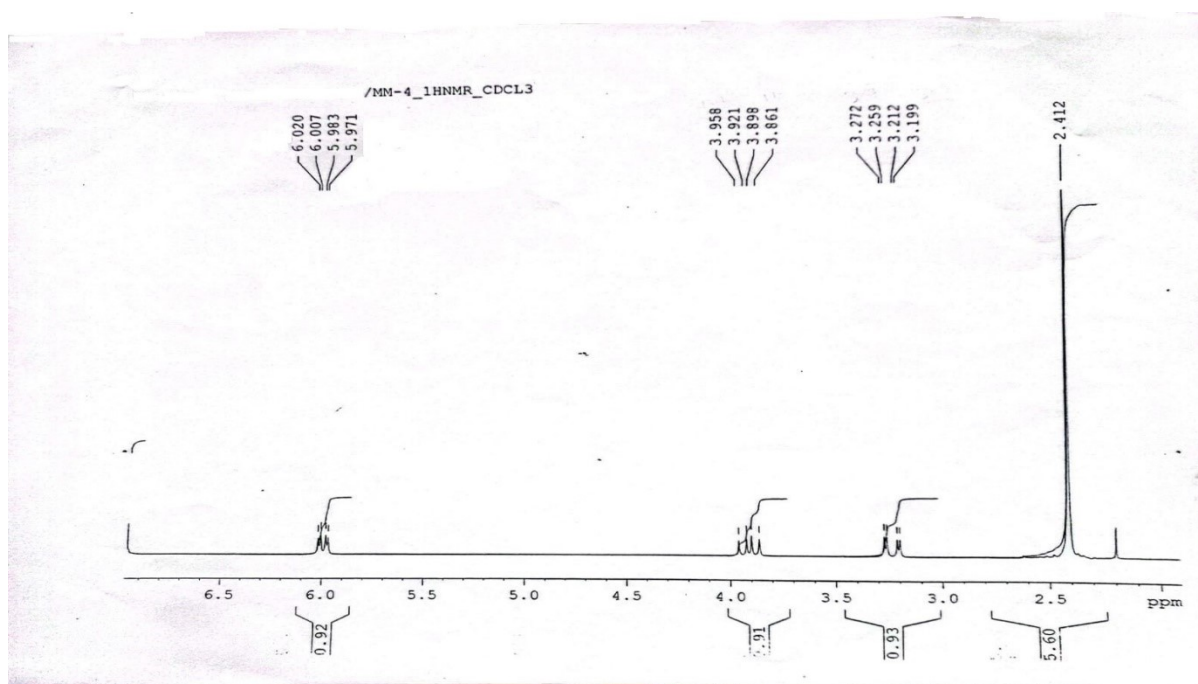

**Figure 5.**  $^{13}\text{C}$ -NMR Spectrum of **5d**

***N*-(5-(4-fluorophenyl)-3-phenyl-4,5-dihydro-1*H*-pyrazole-1-carbonothioyl)-4-methyl-*N*-(4-methylbenzoyl)benzamide (**5d**):**

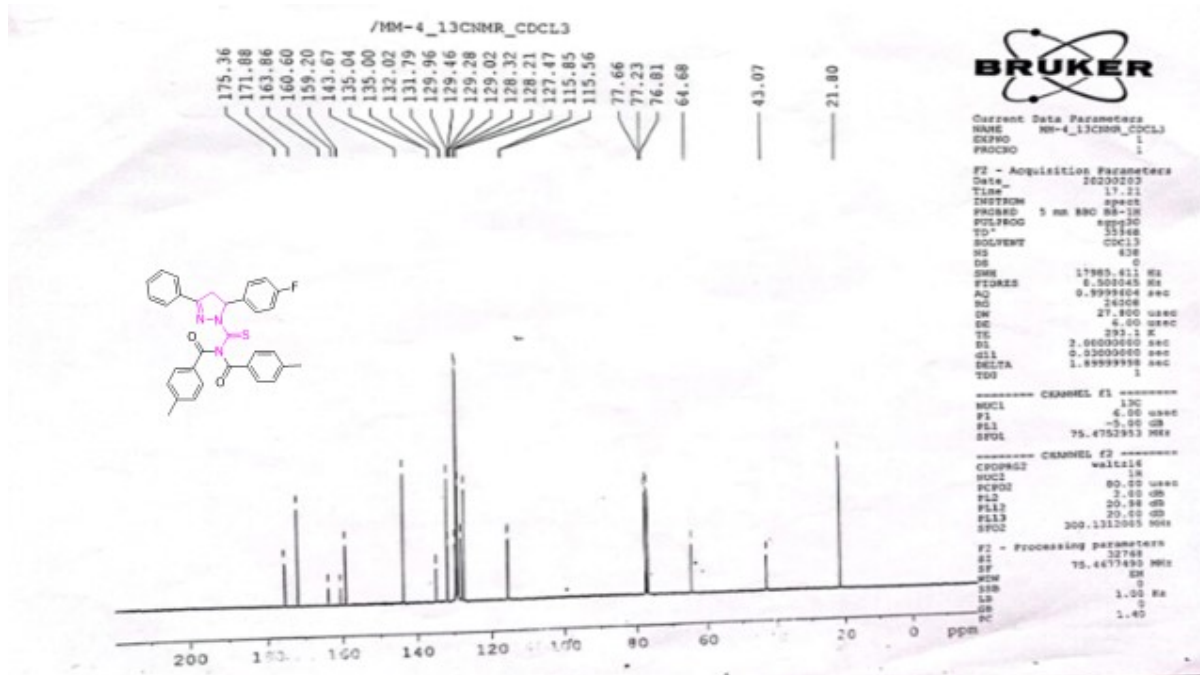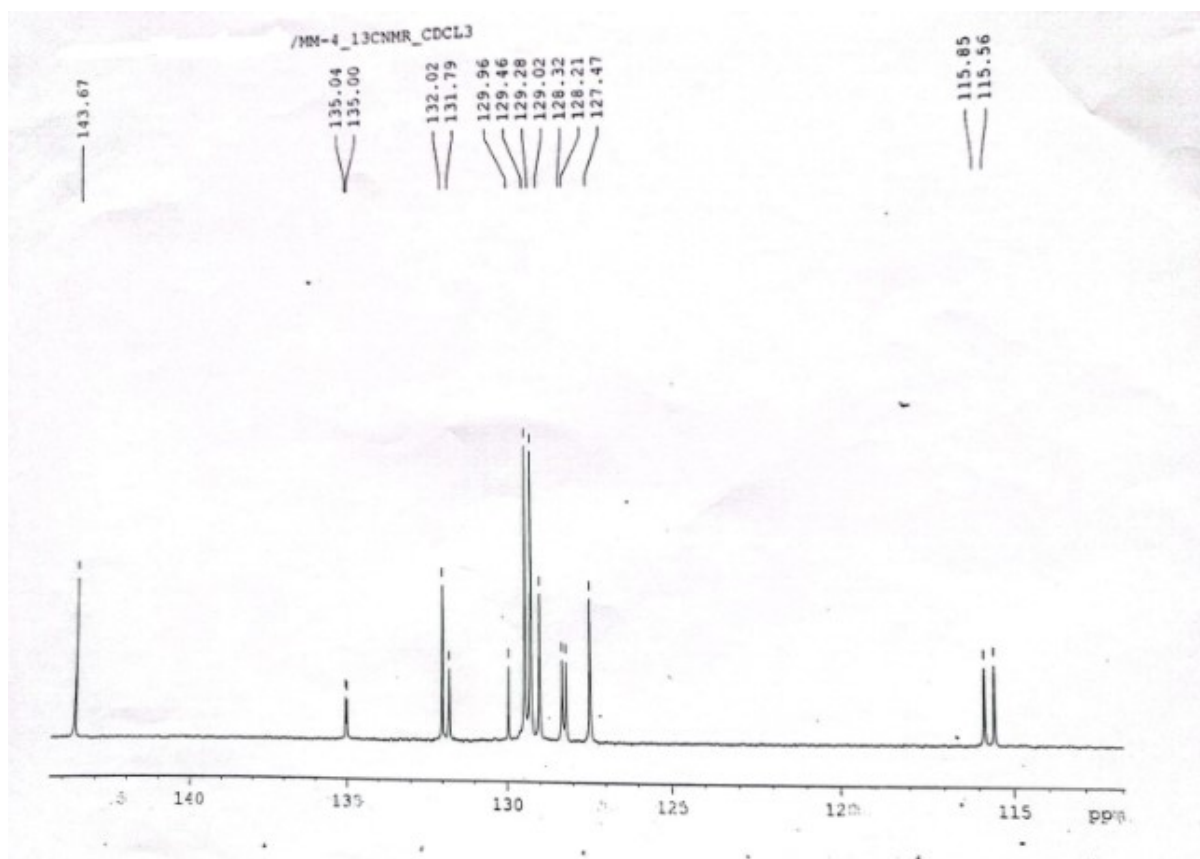

**Figure 6.** FT-IR Spectrum of **5d**

***N***-(5-(4-fluorophenyl)-3-phenyl-4,5-dihydro-1*H*-pyrazole-1-carbonothioyl)-4-methyl-*N*-(4-methylbenzoyl)benzamide (**5d**):



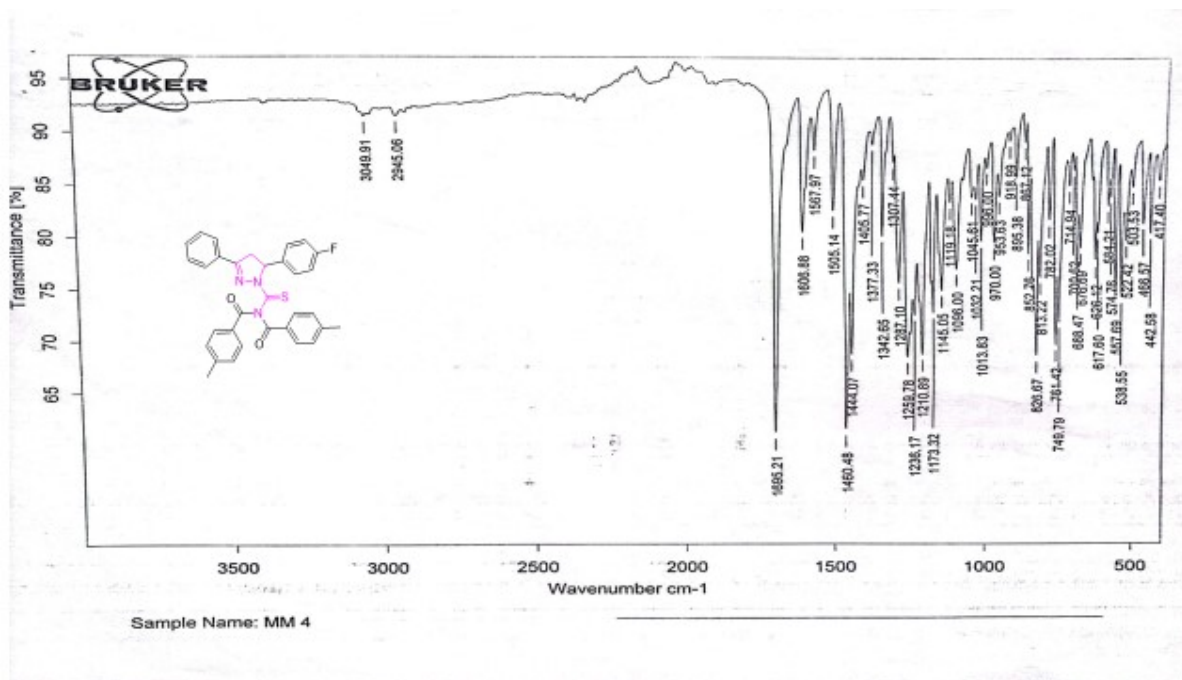

Figure 7. <sup>1</sup>H-NMR Spectrum of 5e

*N*-(3-(4-bromophenyl)-5-(4-fluorophenyl)-4,5-dihydro-1*H*-pyrazole-1-carbonothioyl)-4-methyl-*N*-(4-methylbenzoyl)benzamide (5e):

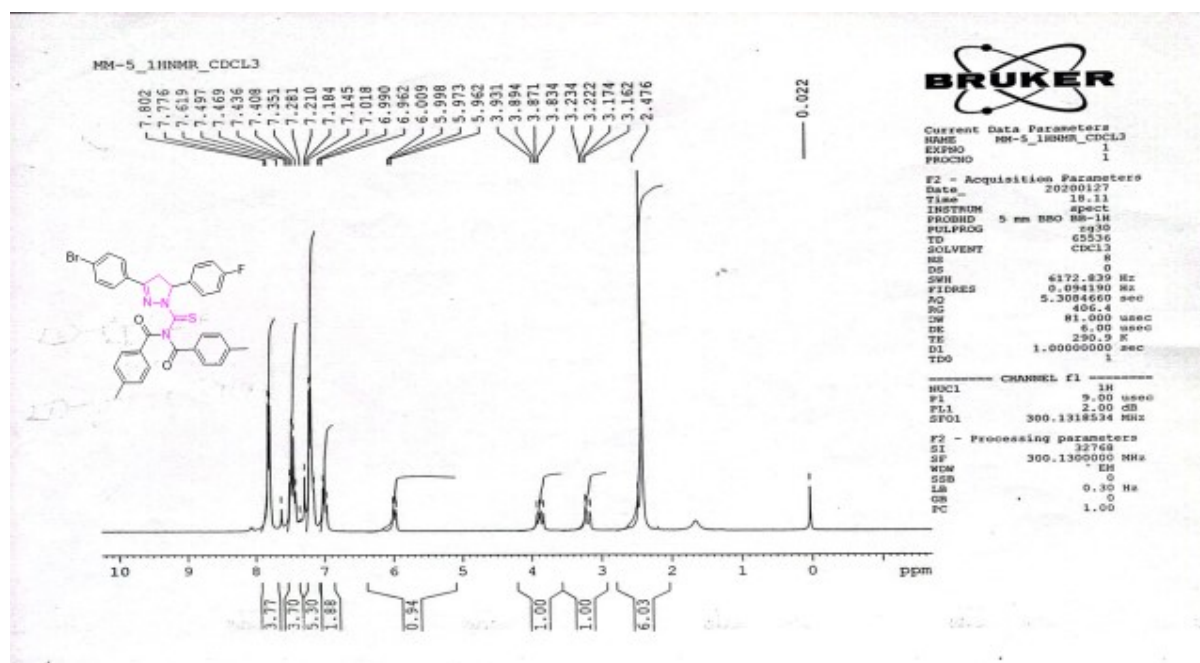

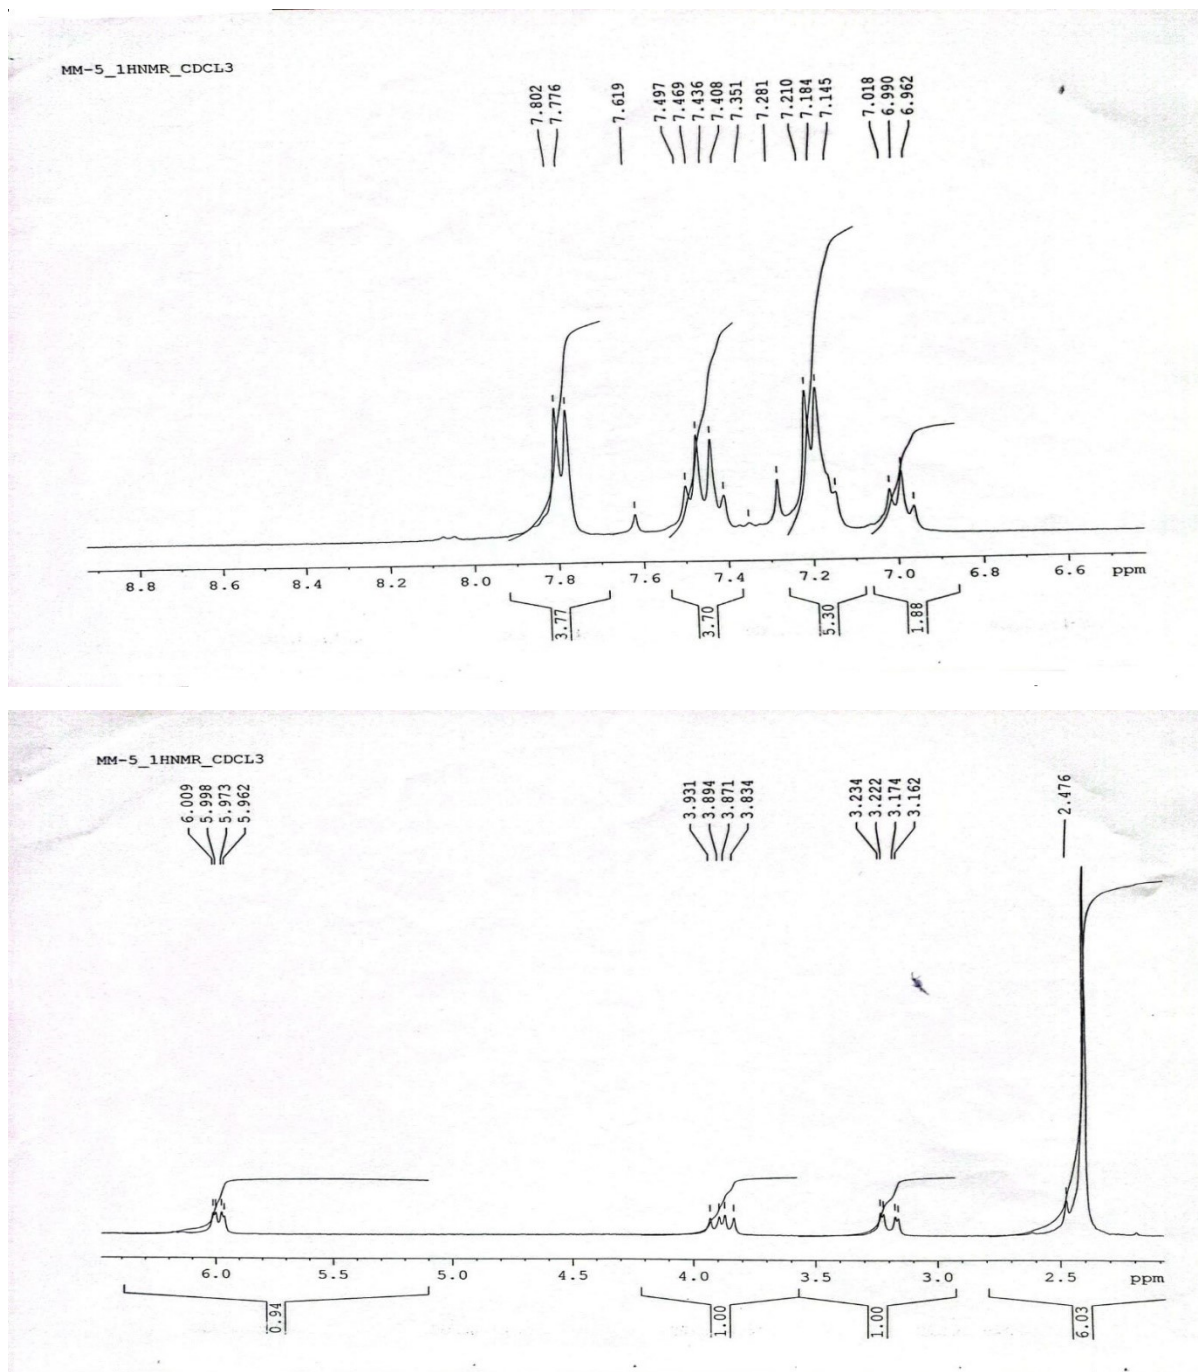

**Figure 8.**  $^1\text{H}$ -NMR Spectrum of **5e**

*N*-(3-(4-bromophenyl)-5-(4-fluorophenyl)-4,5-dihydro-1*H*-pyrazole-1-carbonothioyl)-4-methyl-*N*-(4-methylbenzoyl)benzamide (**5e**):

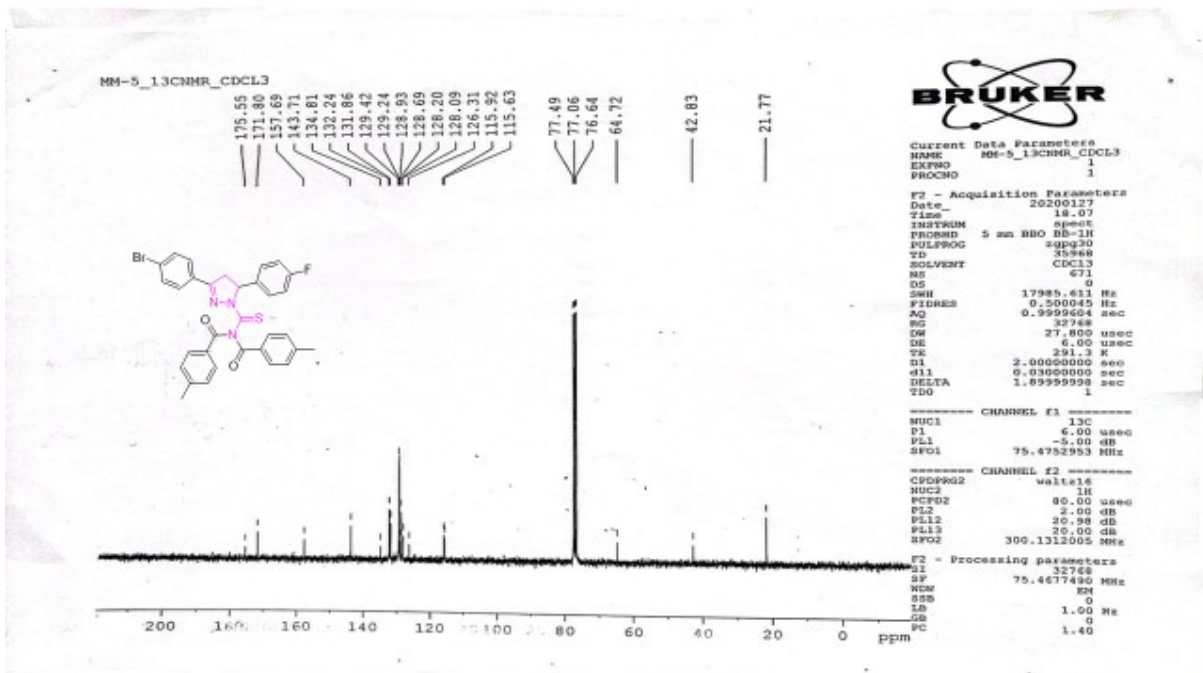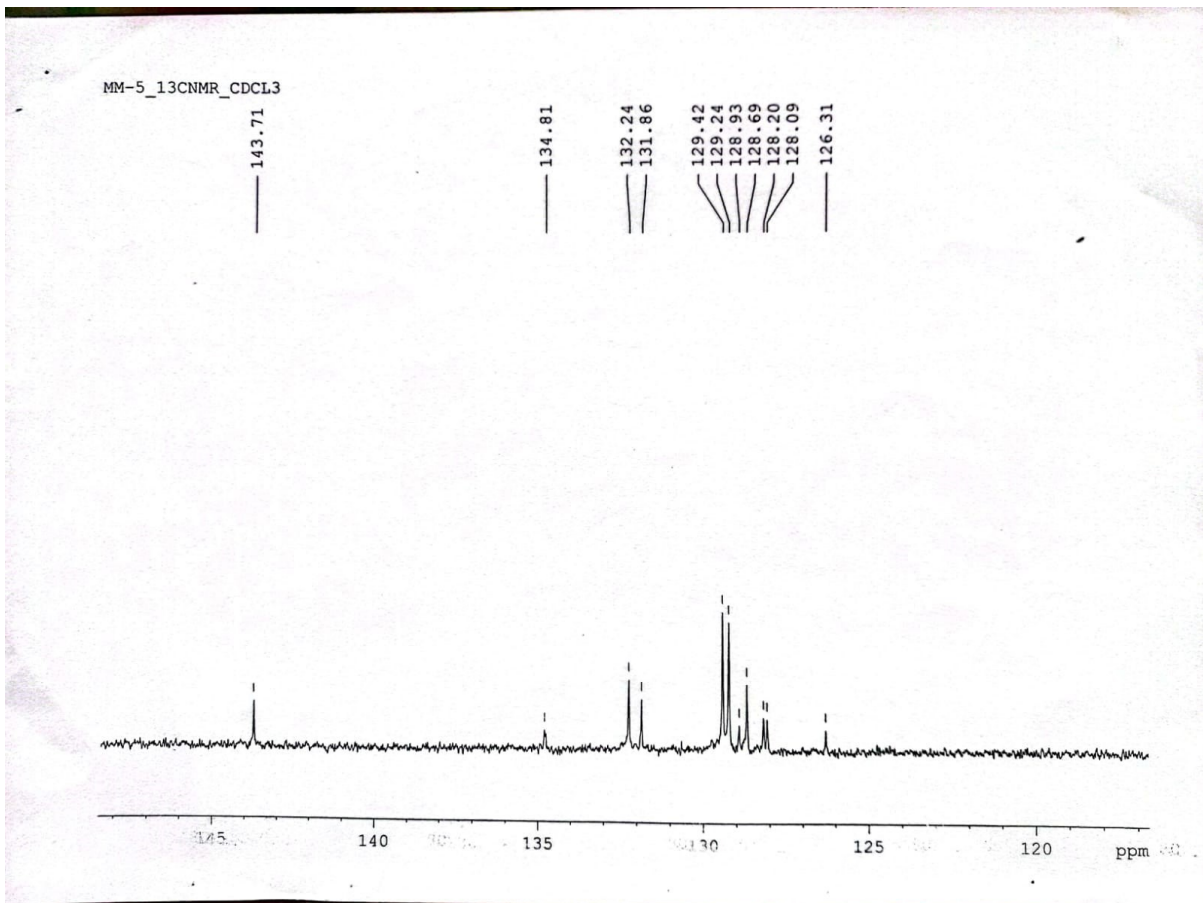

Figure 9. FT-IR Spectrum of 5e

***N*-3-(4-bromophenyl)-5-(4-fluorophenyl)-4,5-dihydro-1*H*-pyrazole-1-carbonothioyl)-4-methyl-*N*-(4-methylbenzoyl)benzamide (5e):**

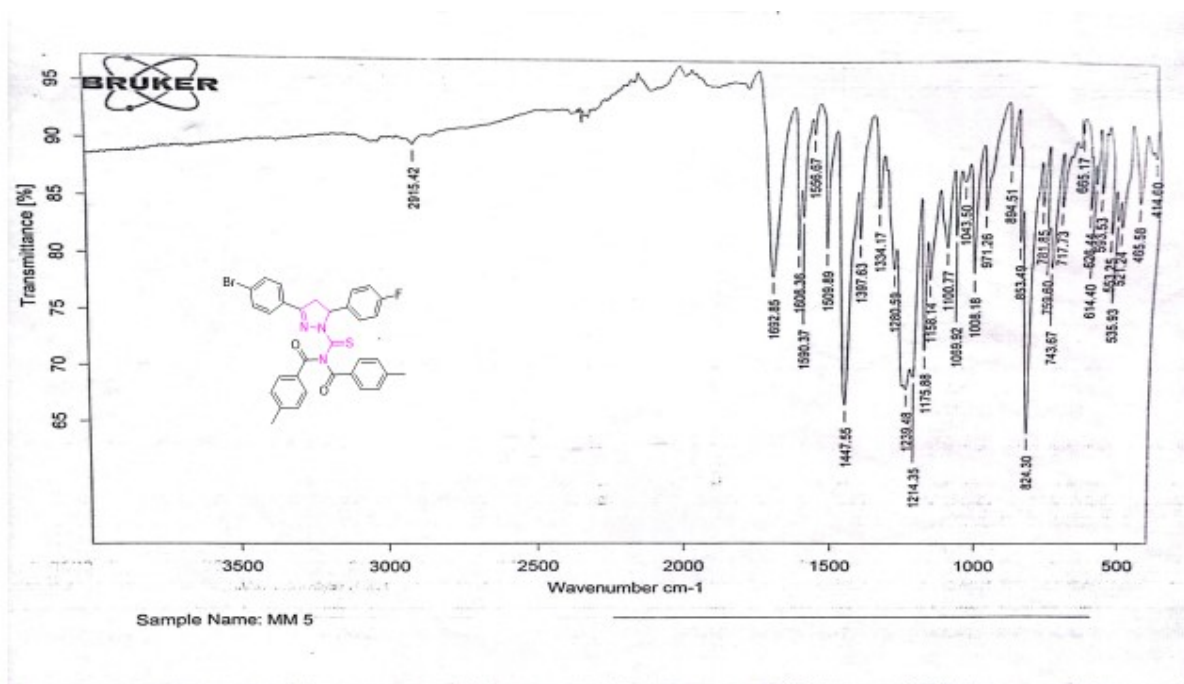

**Figure 10.** <sup>1</sup>H-NMR Spectrum of 5f

***N*-3-(4-bromophenyl)-5-(3-fluorophenyl)-4,5-dihydro-1*H*-pyrazole-1-carbonothioyl)-4-methyl-*N*-(4-methylbenzoyl)benzamide (5f):**

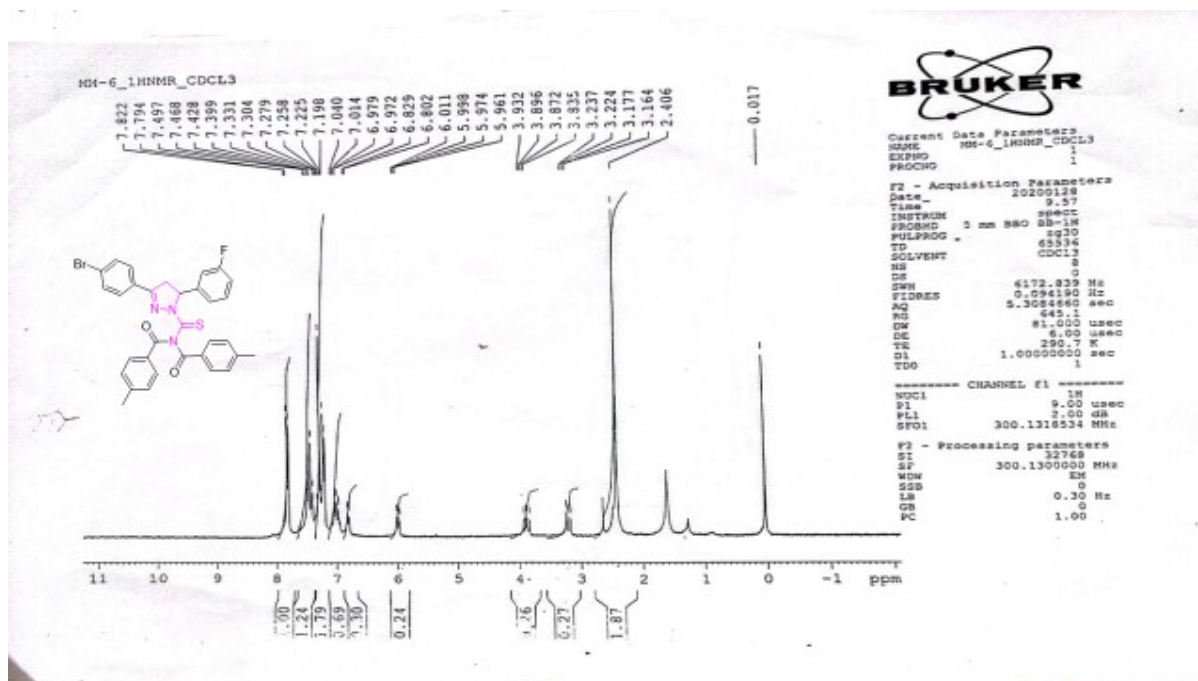

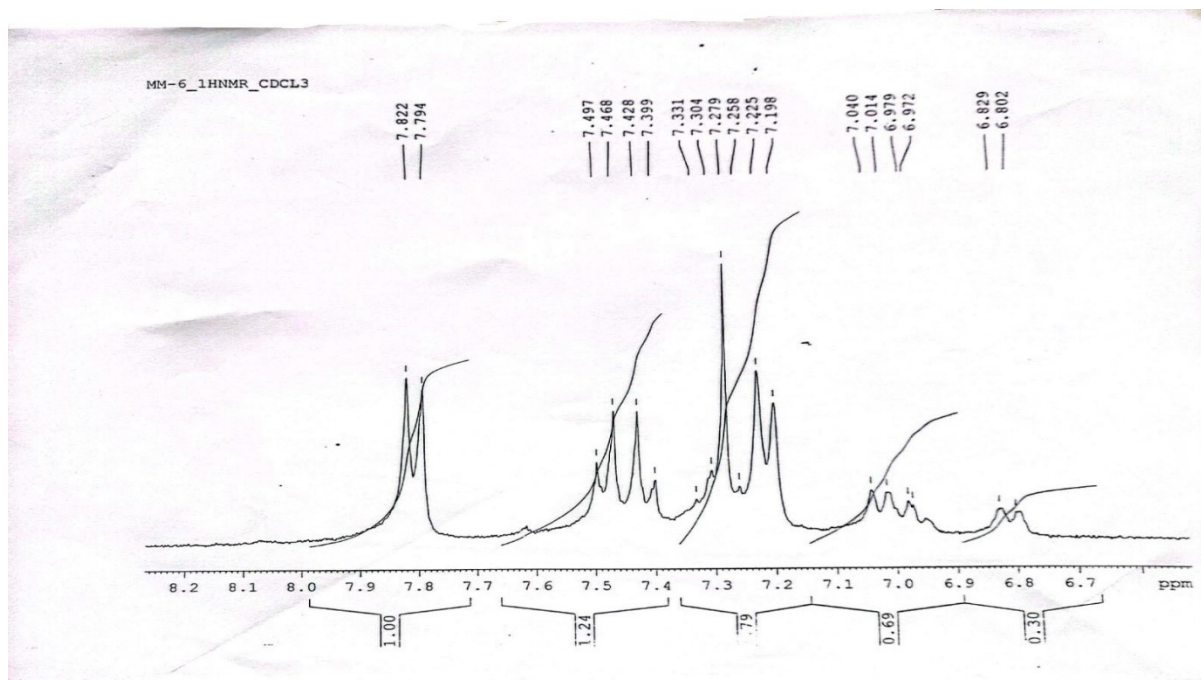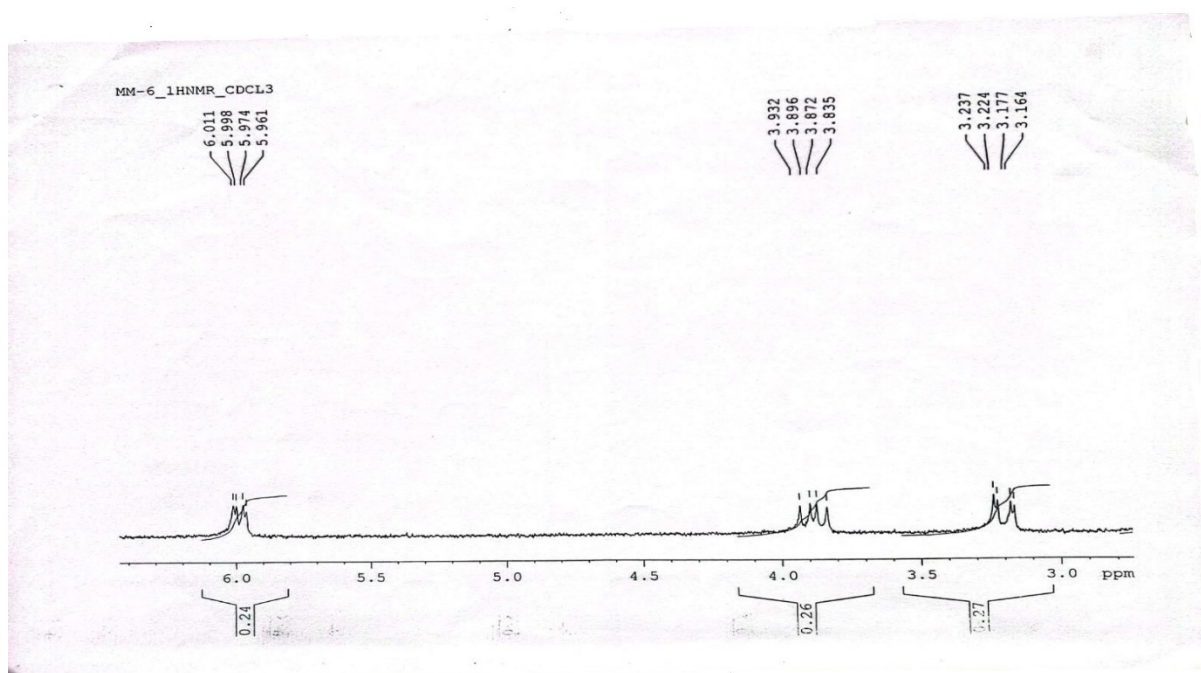

**Figure 11.**  $^1\text{H-NMR}$  Spectrum of **5i**

***N***-(5-(4-fluorophenyl)-3-(*p*-tolyl)-4,5-dihydro-1*H*-pyrazole-1-carbonothioyl)-4-methyl-*N*-(4-methylbenzoyl)benzamide (**5i**):

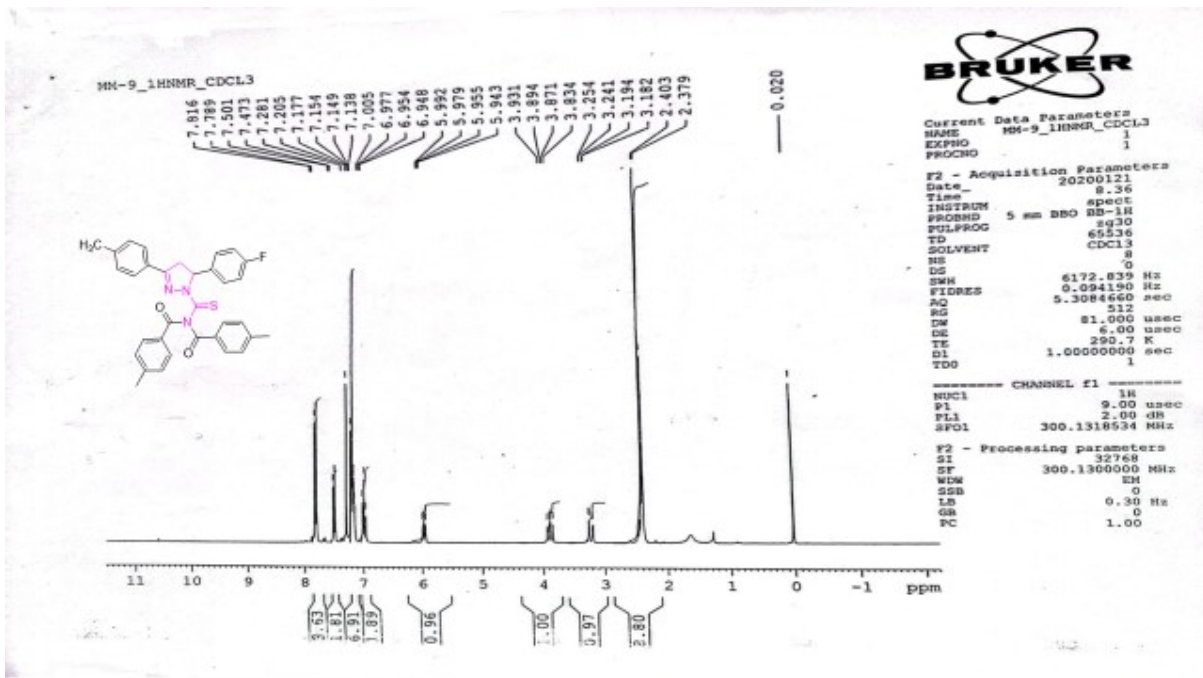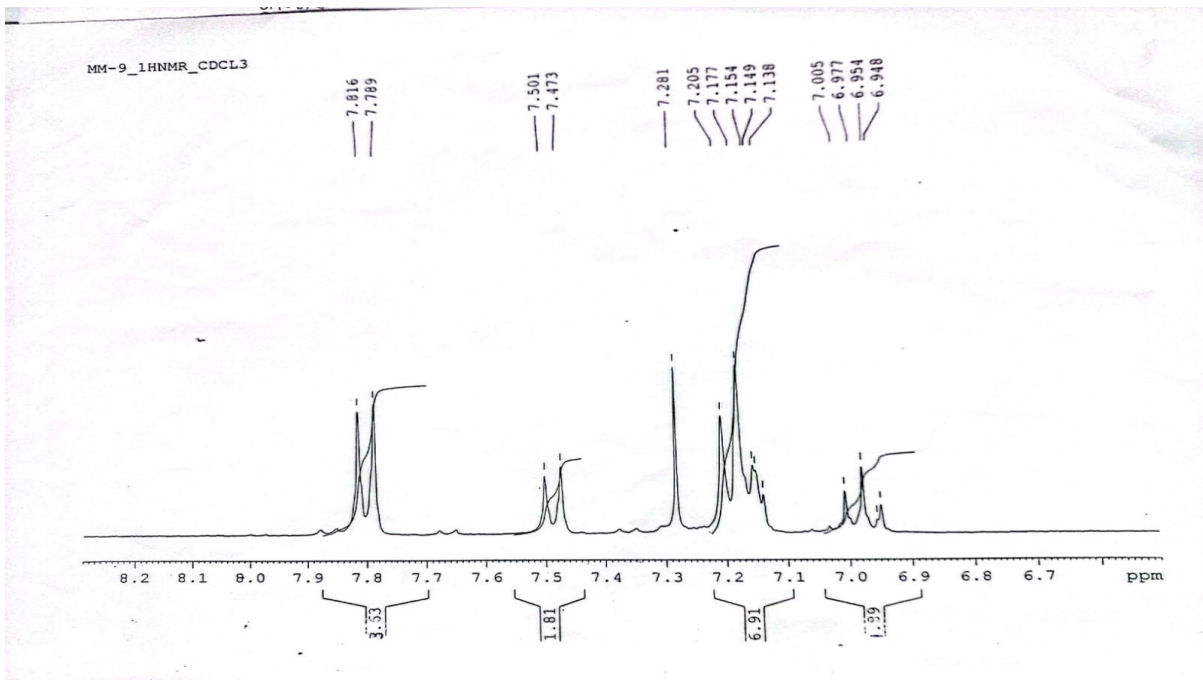

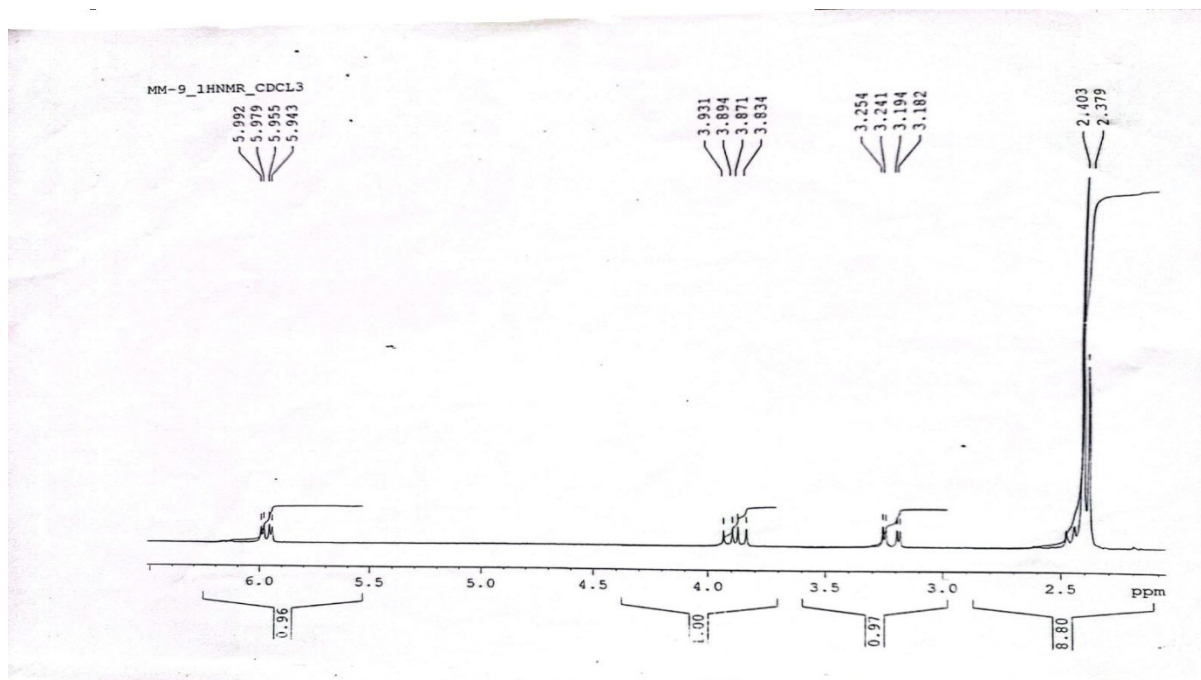

Figure 12.  $^1\text{H}$ -NMR Spectrum of **5i**

*N*-(5-(4-fluorophenyl)-3-(*p*-tolyl)-4,5-dihydro-1*H*-pyrazole-1-carbonothioyl)-4-methyl-*N*-(4-methylbenzoyl)benzamide (**5i**):

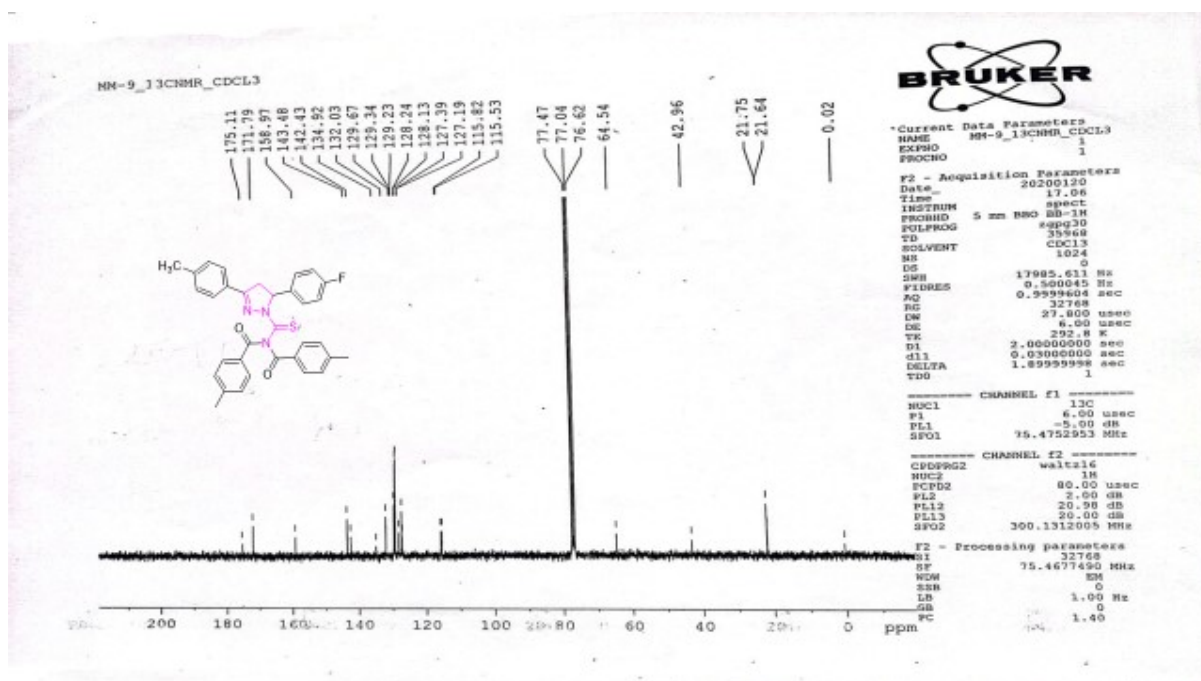

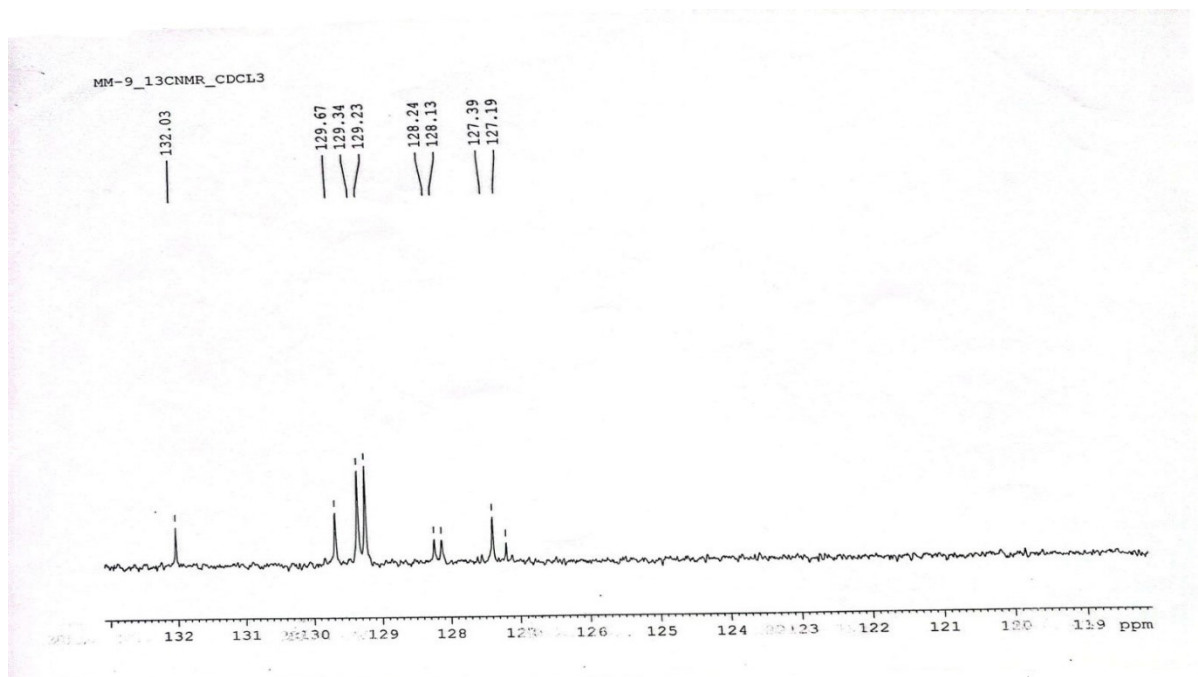

**Figure 13.** FT-IR Spectrum of **5j**

*N*-(5-(4-chlorophenyl)-3-(*p*-tolyl)-4,5-dihydro-1*H*-pyrazole-1-carbonothioyl)-4-methyl-*N*-(4-methylbenzoyl)benzamide (**5j**):

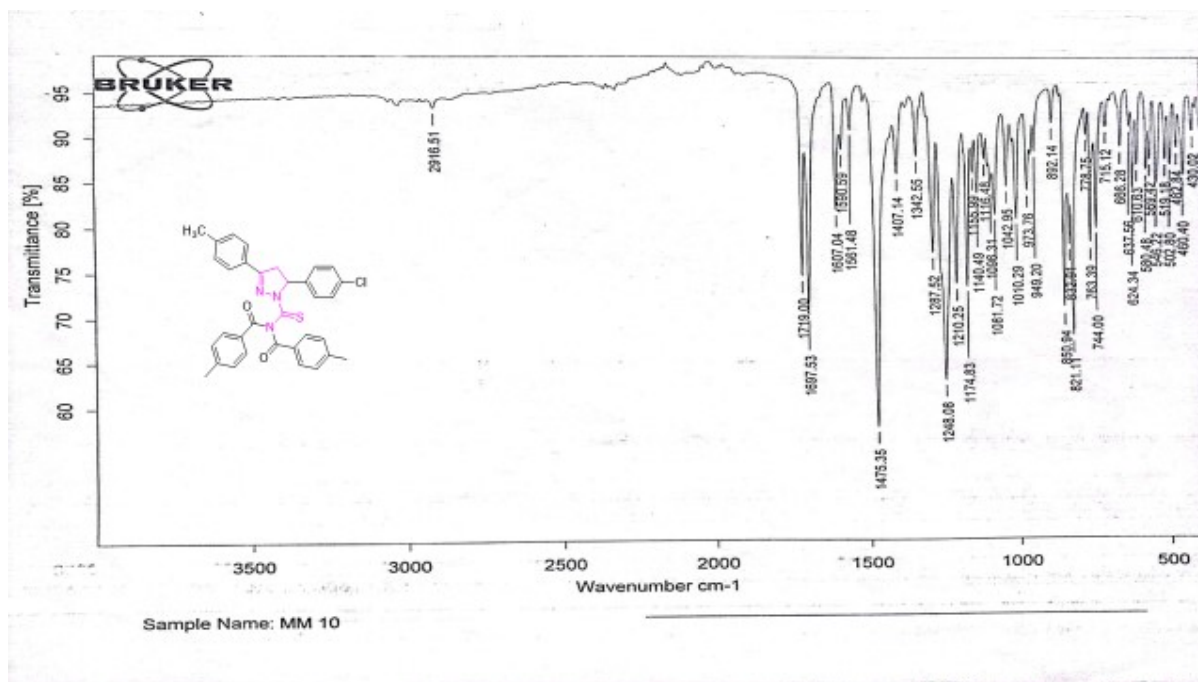

**Figure 14.** <sup>1</sup>H-NMR Spectrum of **5k**

*N*-(3,5-bis(4-chlorophenyl)-4,5-dihydro-1*H*-pyrazole-1-carbonothioyl)-4-methylbenzamide (**5k**):



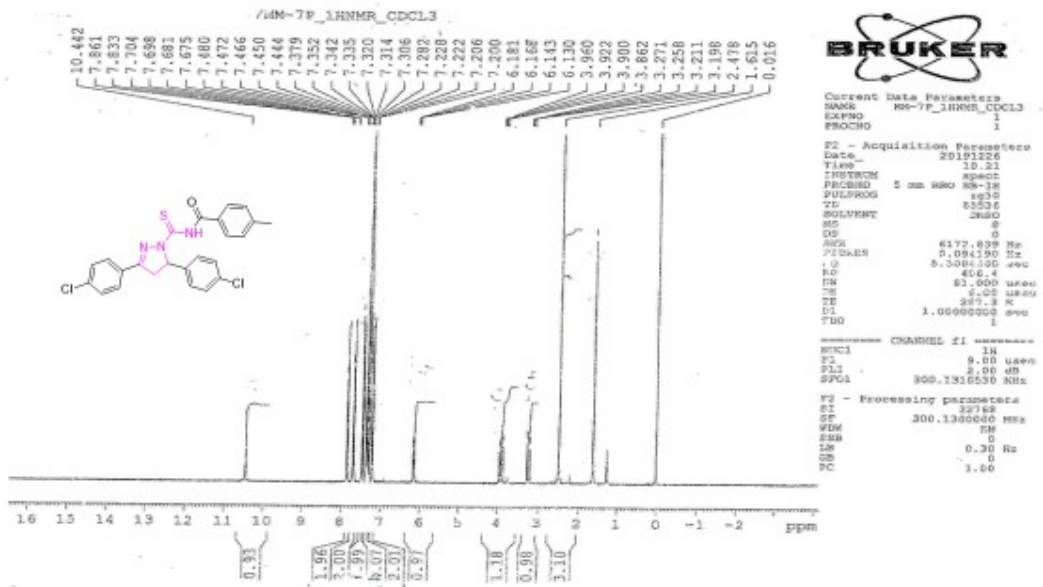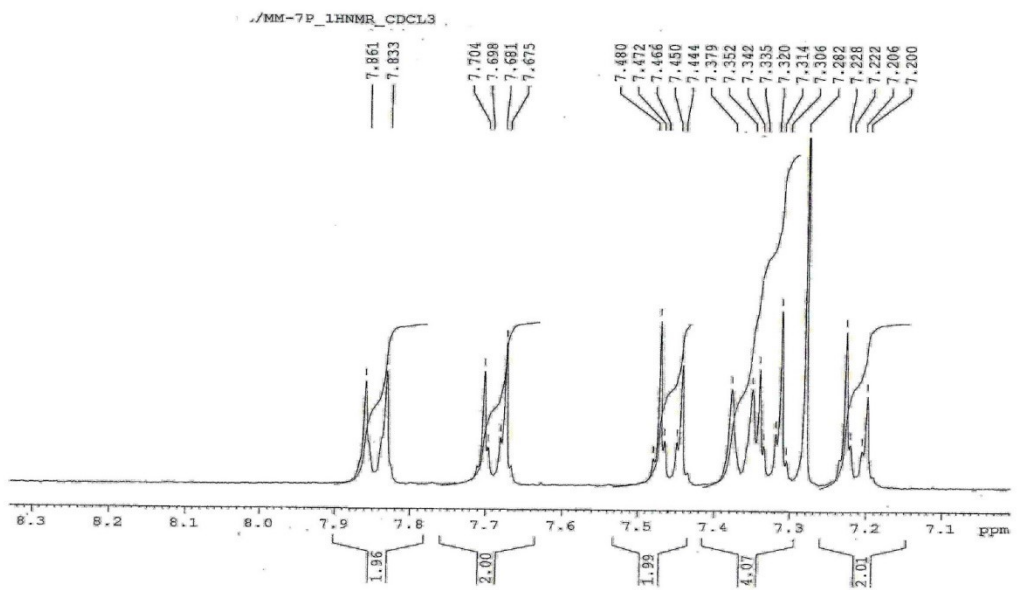

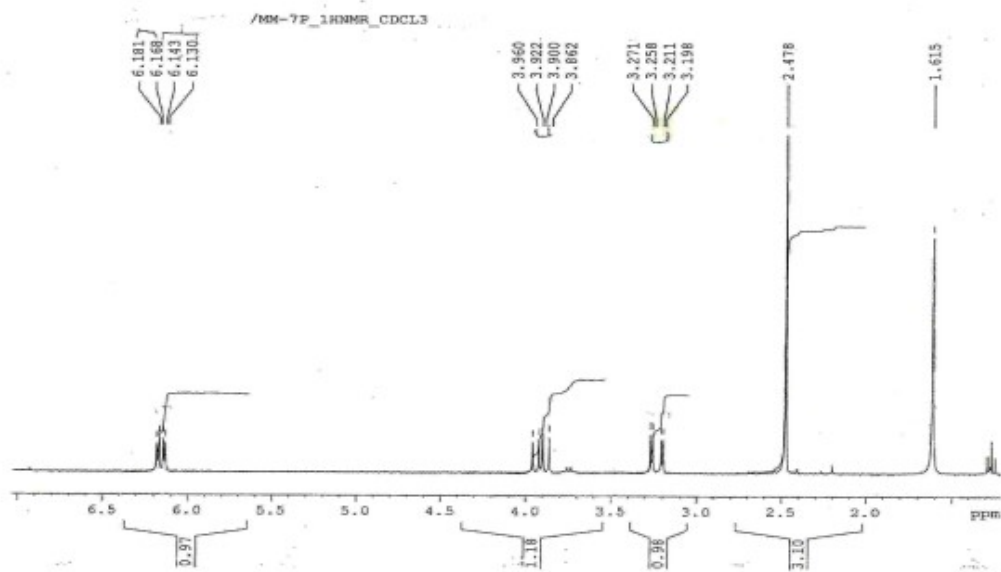

Figure 15. <sup>13</sup>C-NMR Spectrum of **5k**

*N*-(3,5-bis(4-chlorophenyl)-4,5-dihydro-1*H*-pyrazole-1-carbonothioyl)-4-methylbenzamide (**5k**):

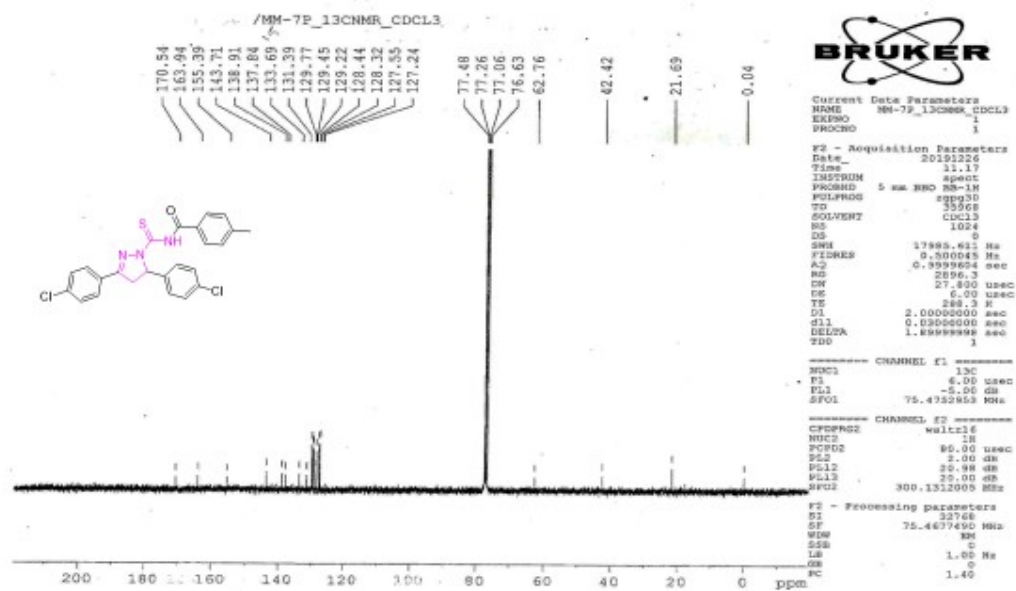

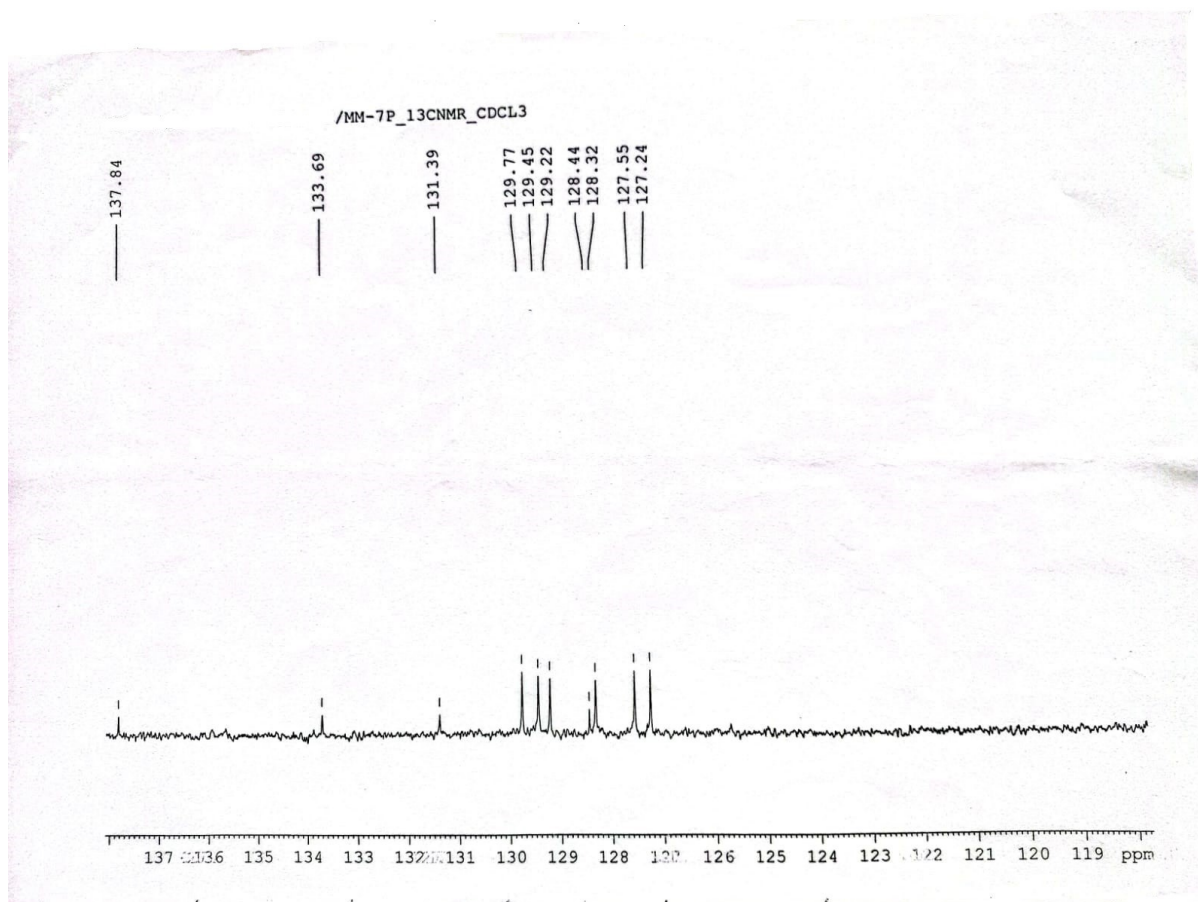

**Figure 16. FT-IR Spectrum of 5k**

***N*-(3,5-bis(4-chlorophenyl)-4,5-dihydro-1*H*-pyrazole-1-carbonothioyl)-4-methylbenzamide (5k):**

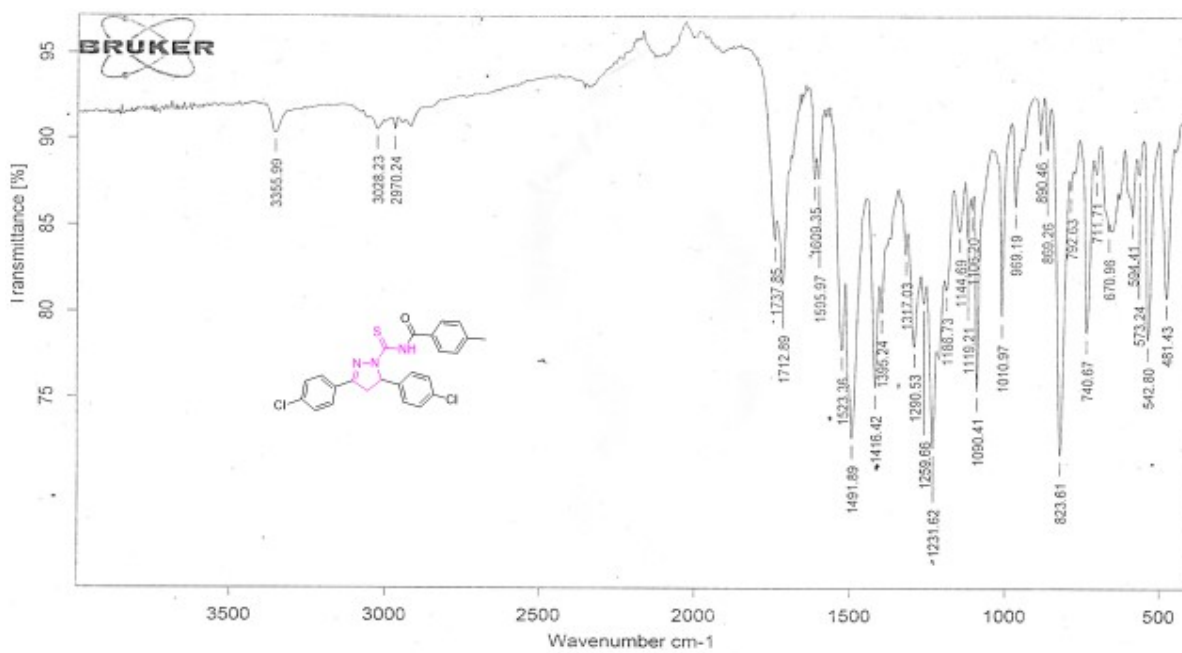

Sample Name: MM 7

Figure 17. FT-IR Spectrum of 5m

*N*-(5-(4-fluorophenyl)-3-phenyl-4,5-dihydro-1*H*-pyrazole-1-carbonothioyl)-4-methylbenzamide (5m):

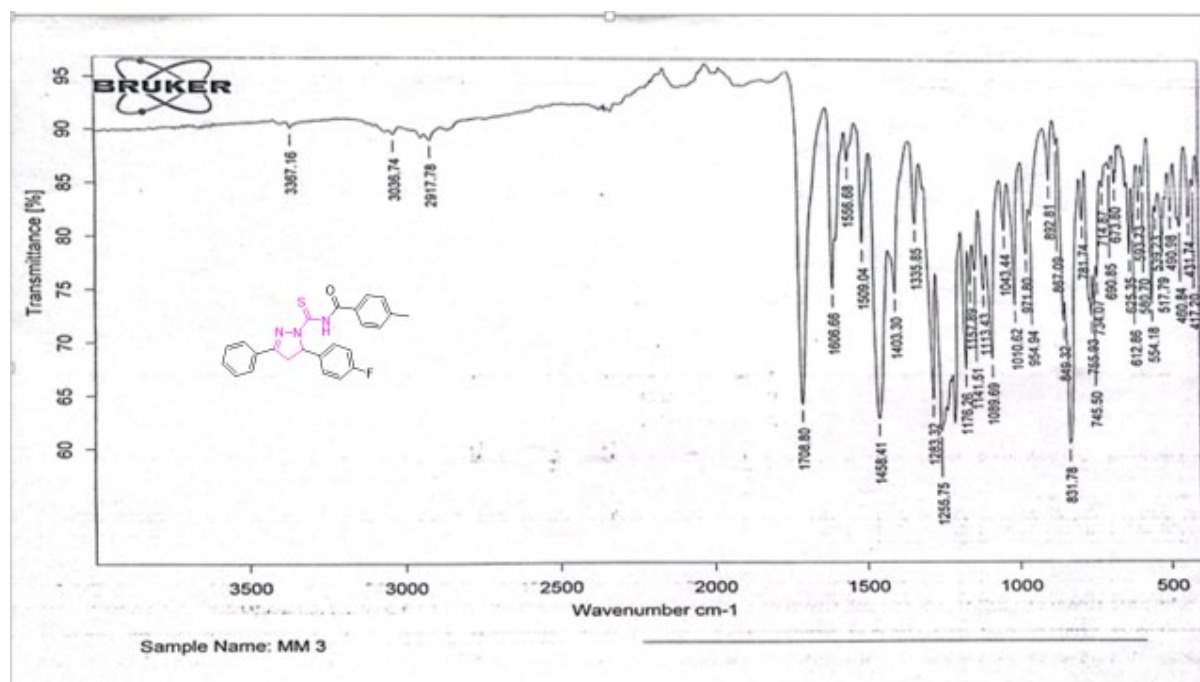

Figure 18. Amylase interaction images of compounds 5a, 5c, 5d, 5e, 5g, 5h, 5i, 5j.

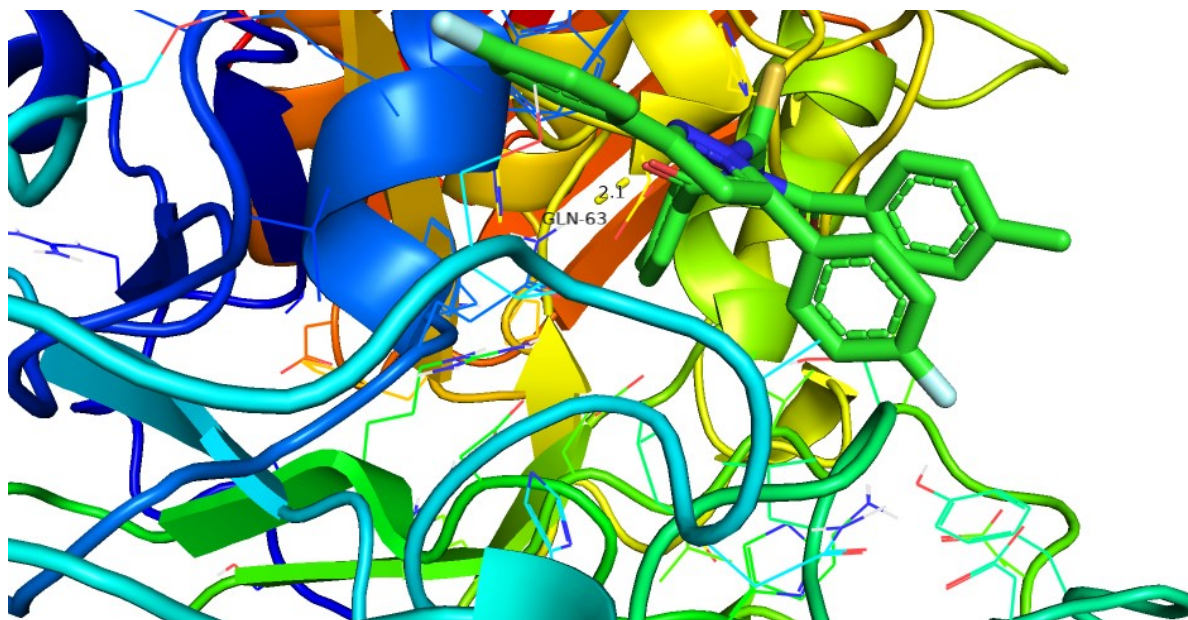

5a

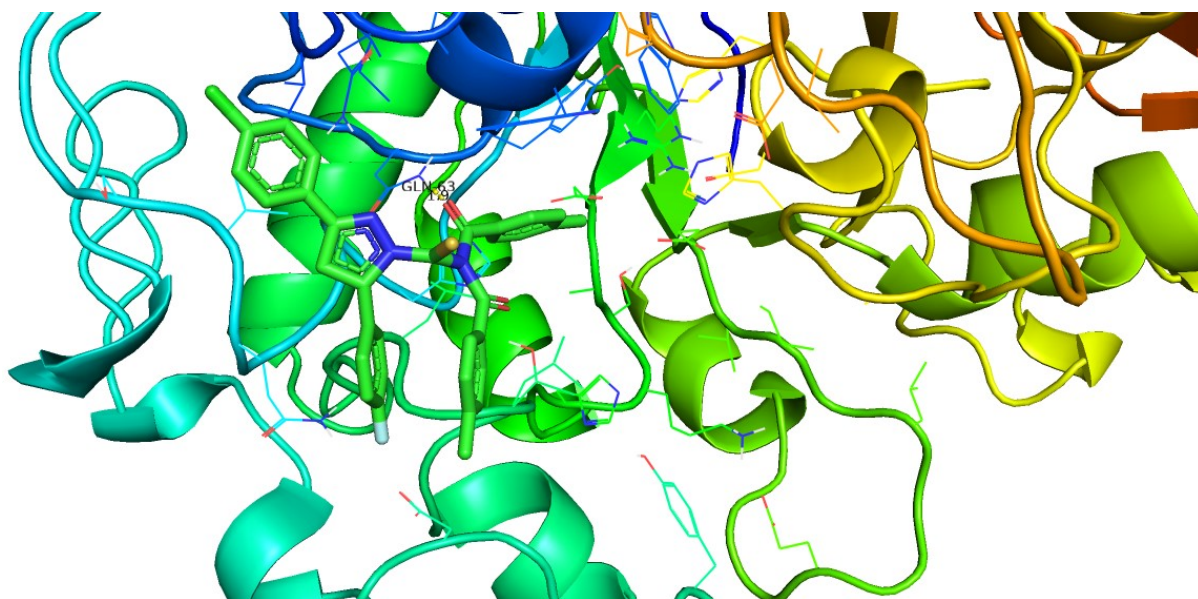

5c

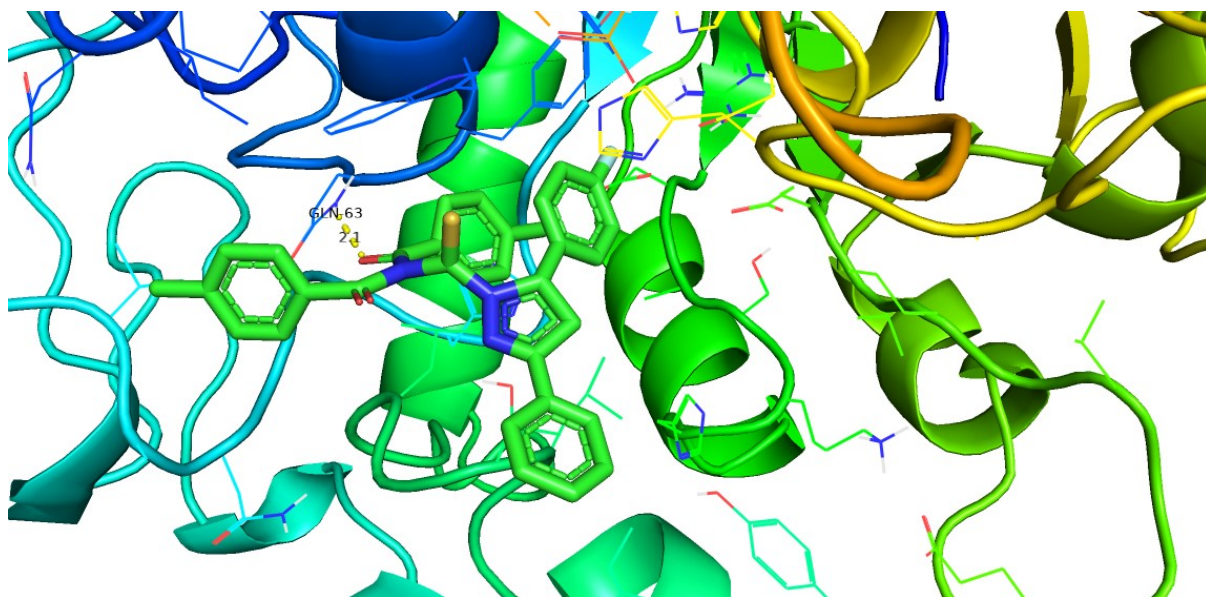

5d

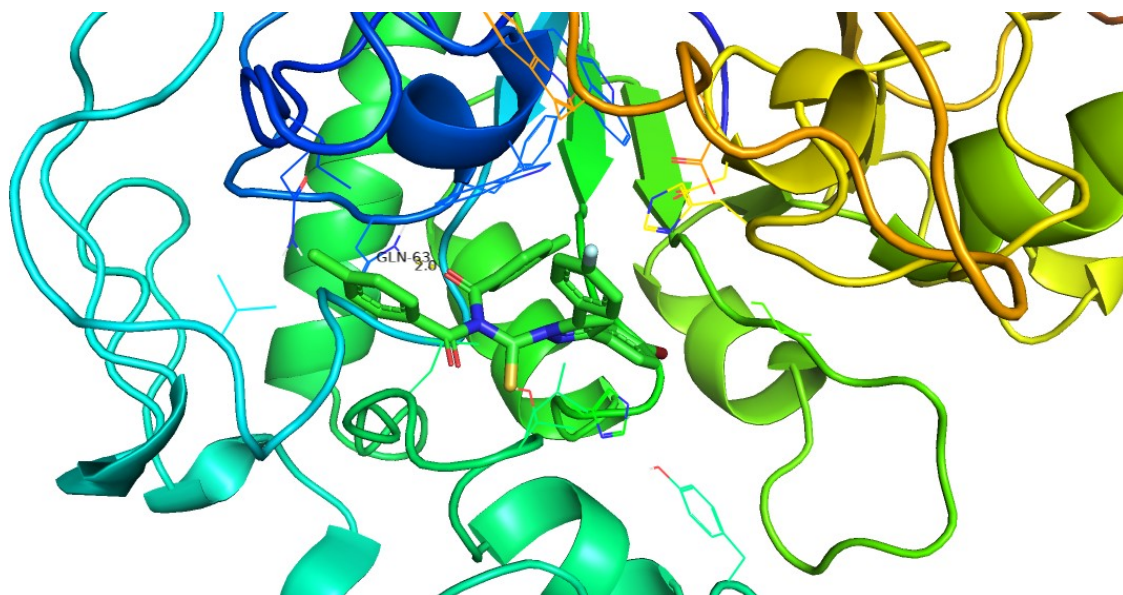

5e

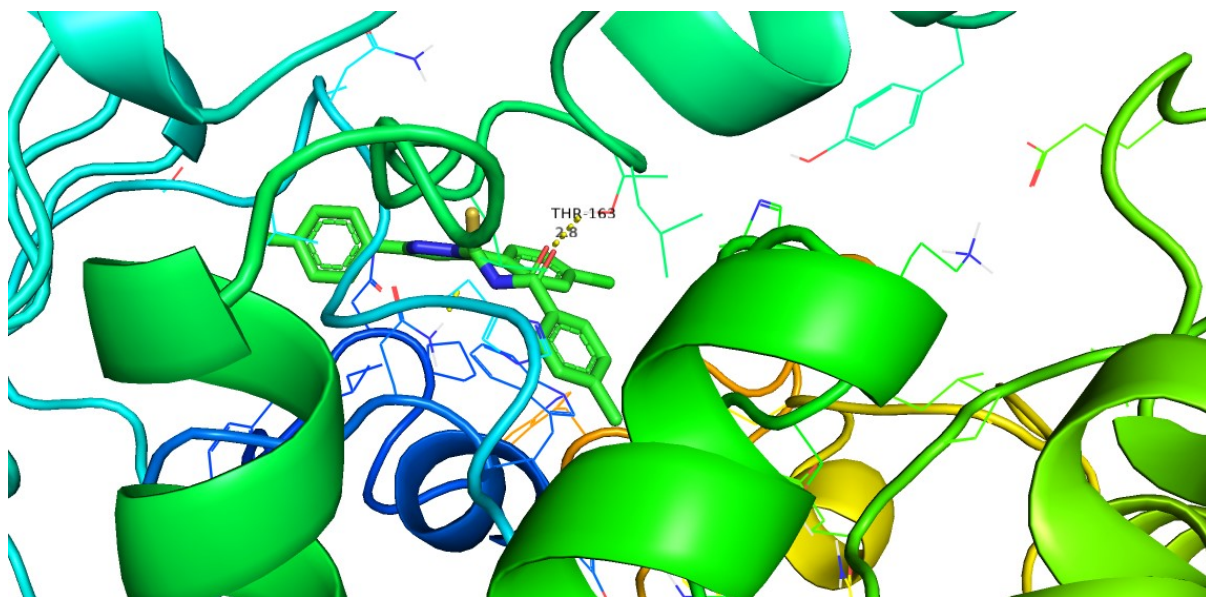

5g

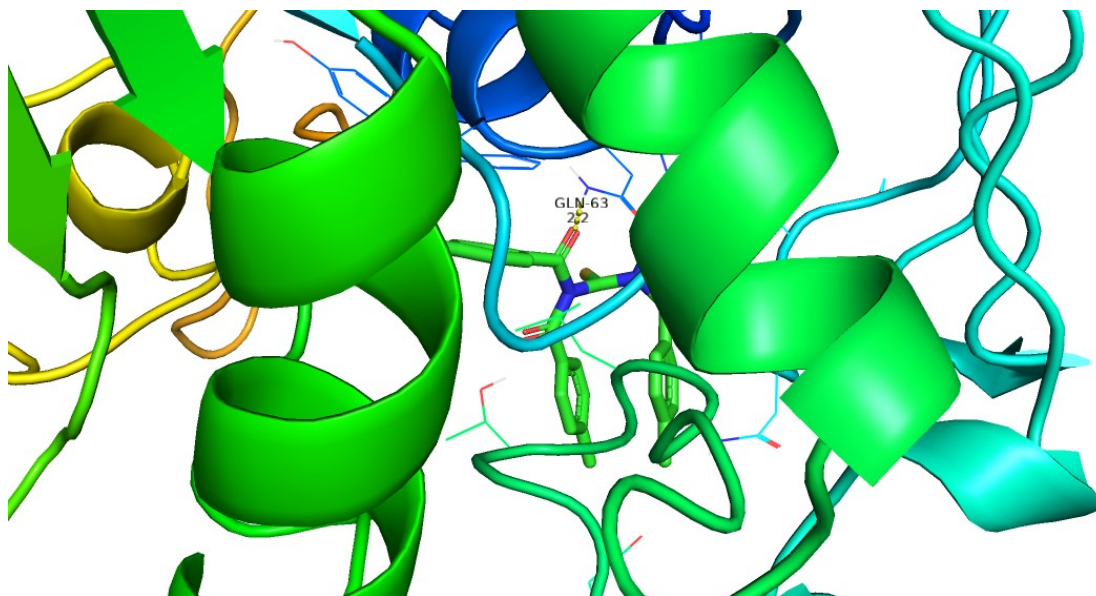

5h

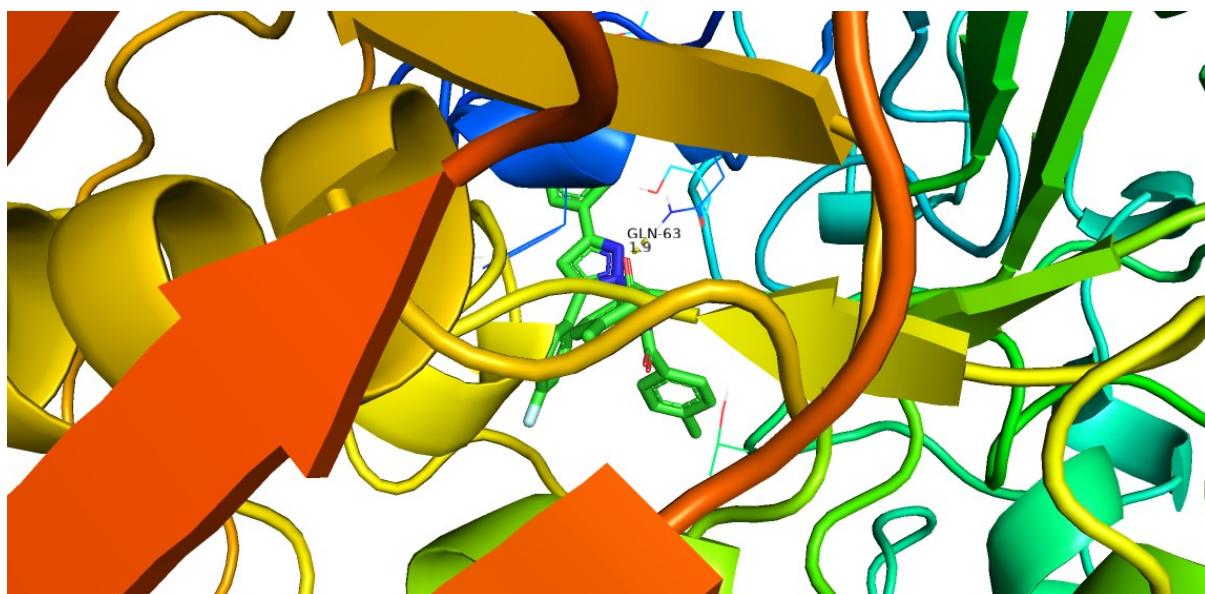

5i

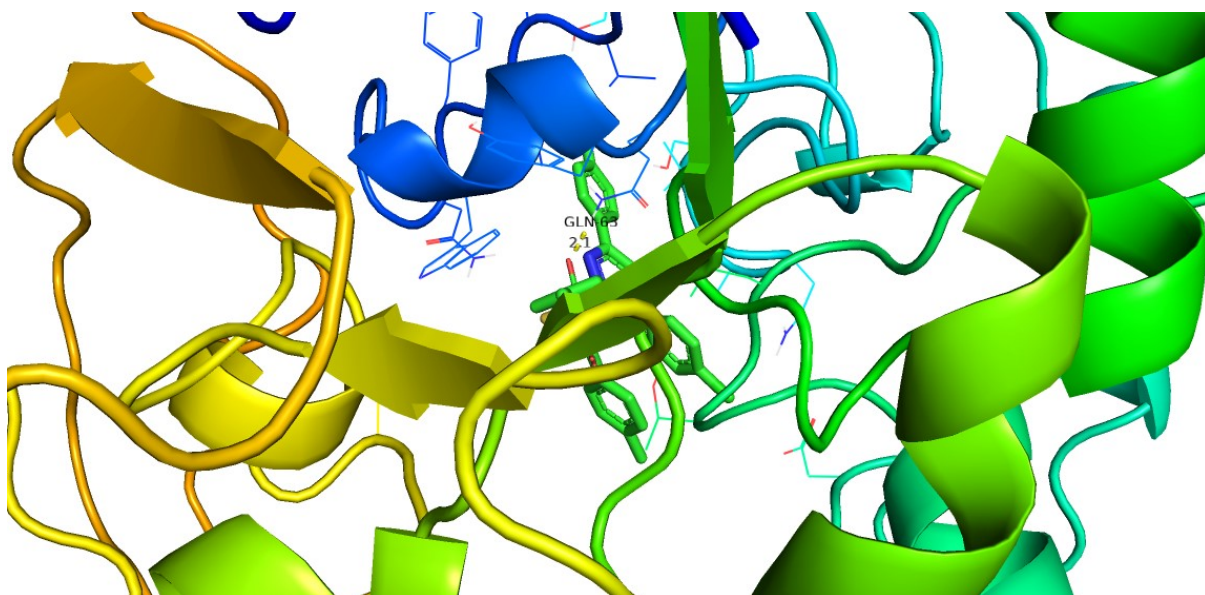

5j

Figure 19. A-Glucosidase interaction images of compounds 5a, 5b 5c, 5d, 5e, 5f, 5g, 5h, 5i, 5j.



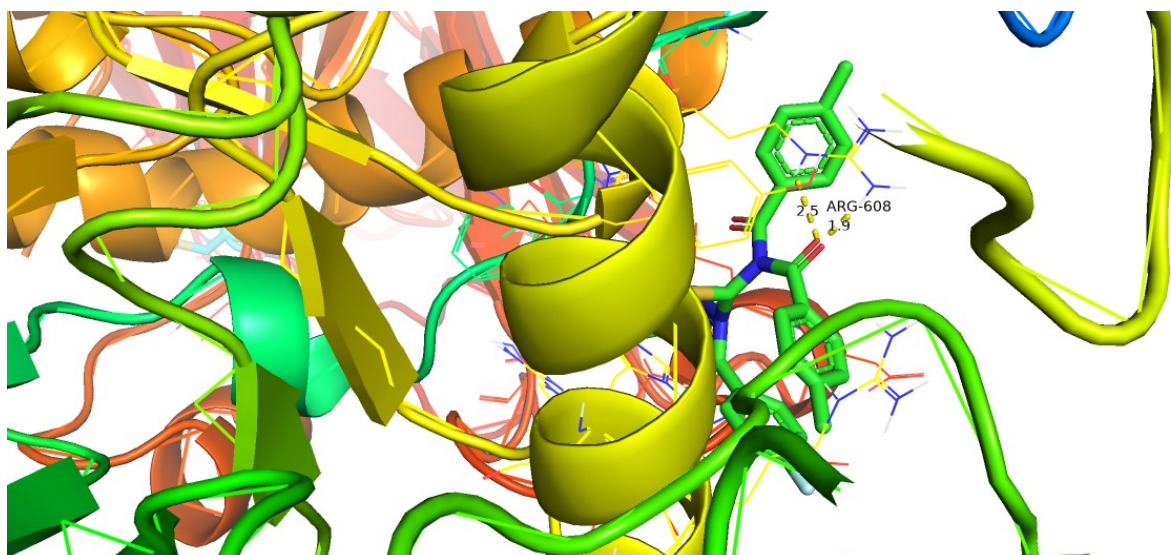

5a

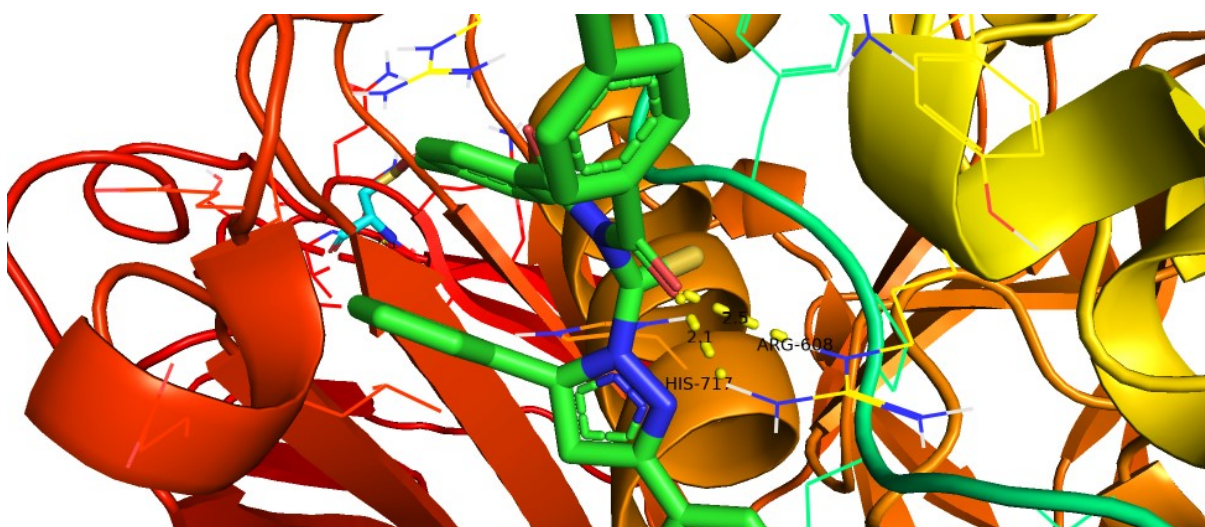

5b

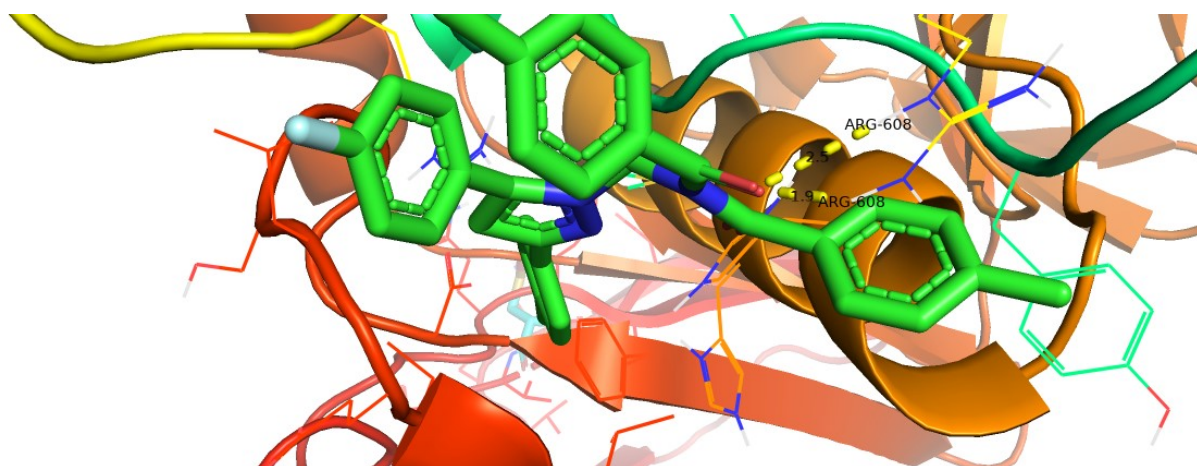

5c

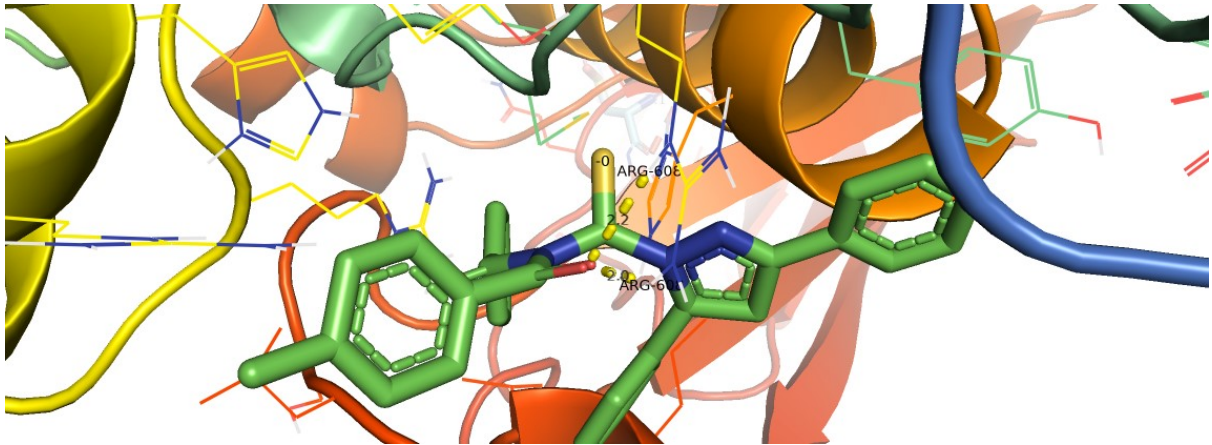

5d

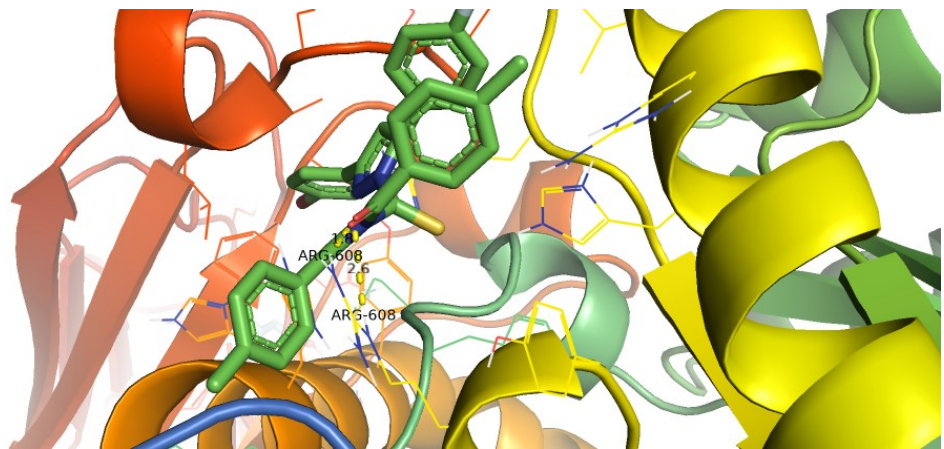

5e

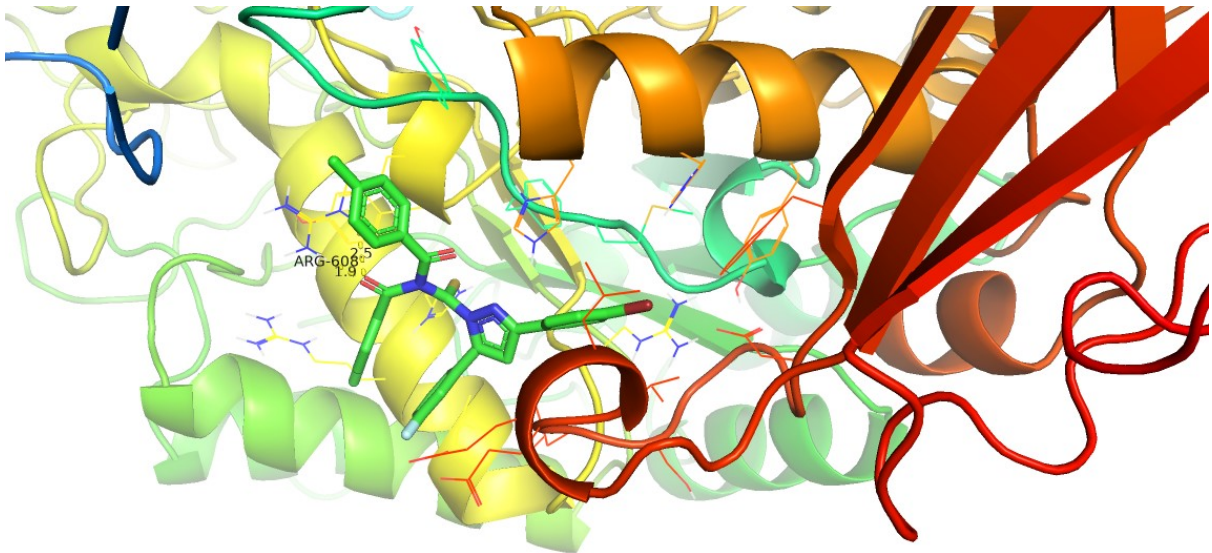

5f

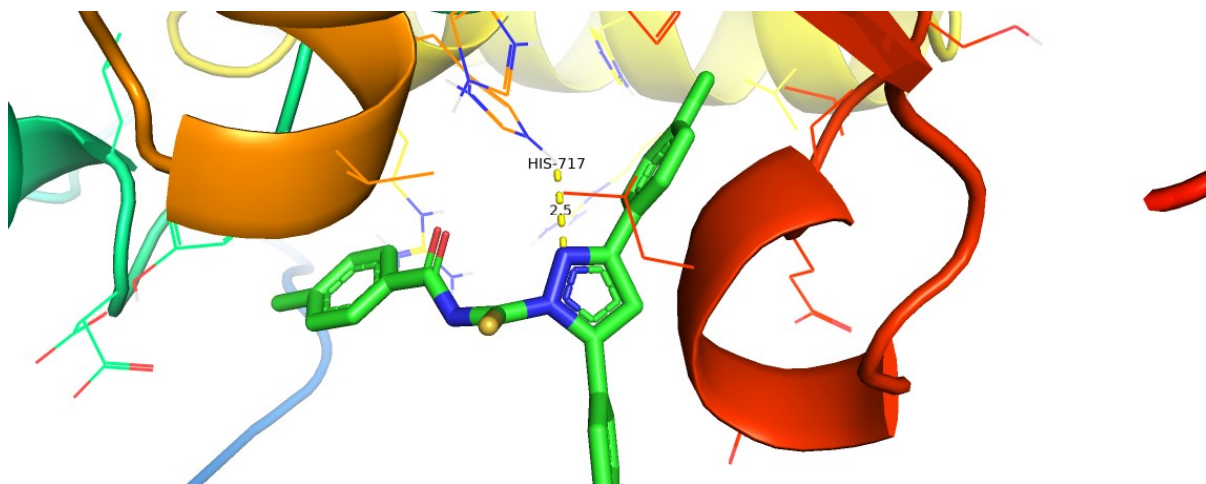

5g

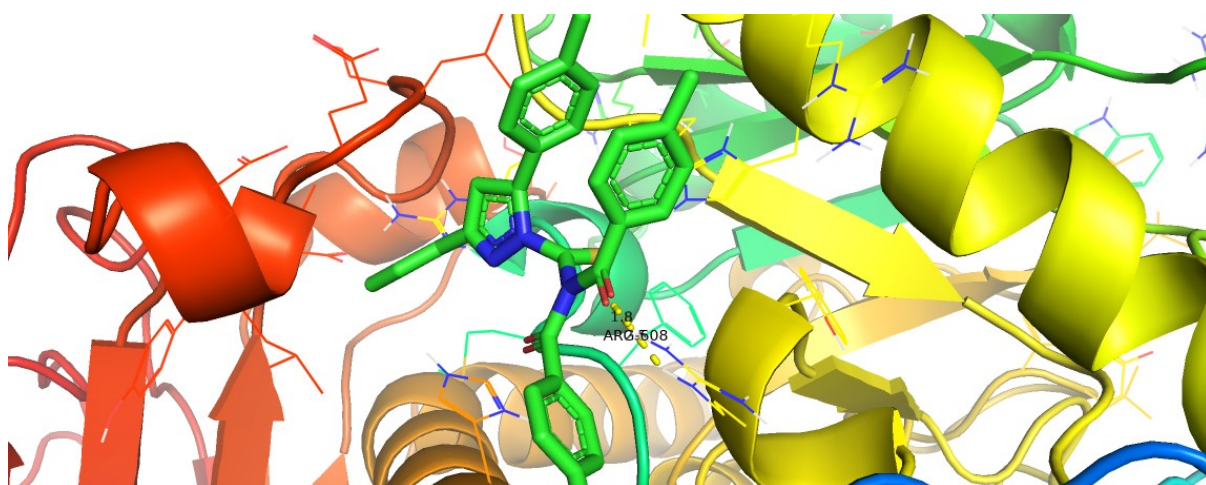

5h

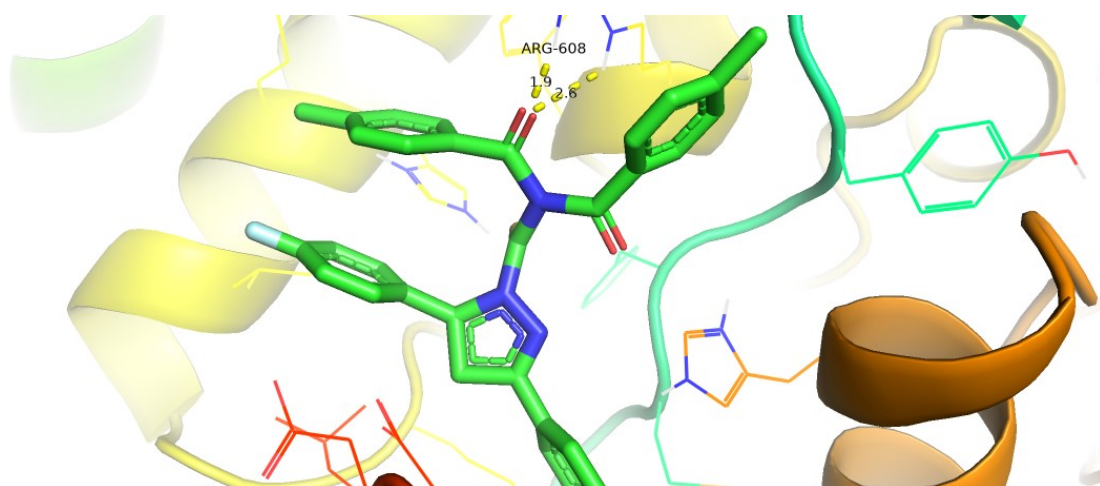

5i

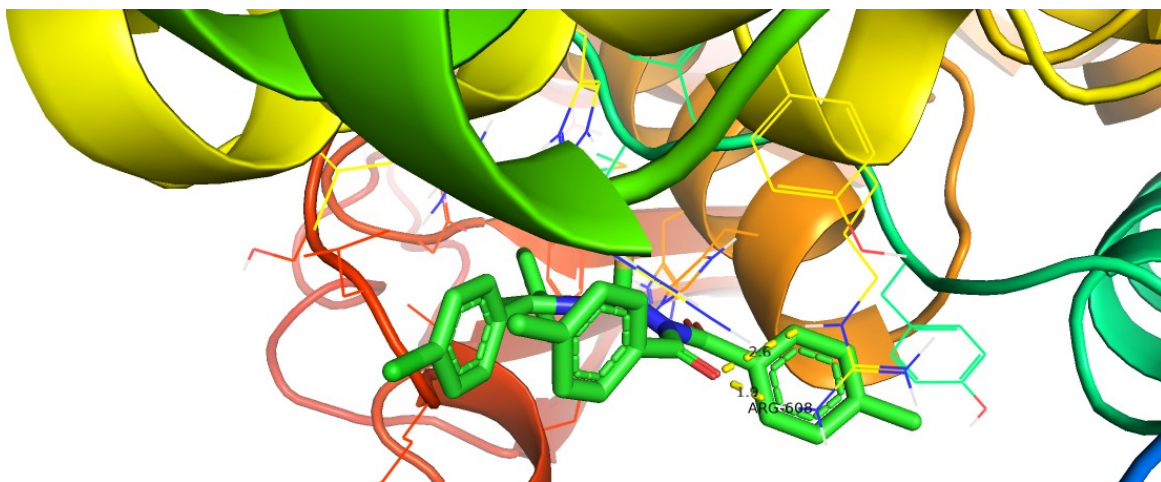

5j

Figure 20. Urease interaction images of compounds 5a, 5b 5c, 5d, 5e, 5f, 5g, 5h, 5i, 5j.

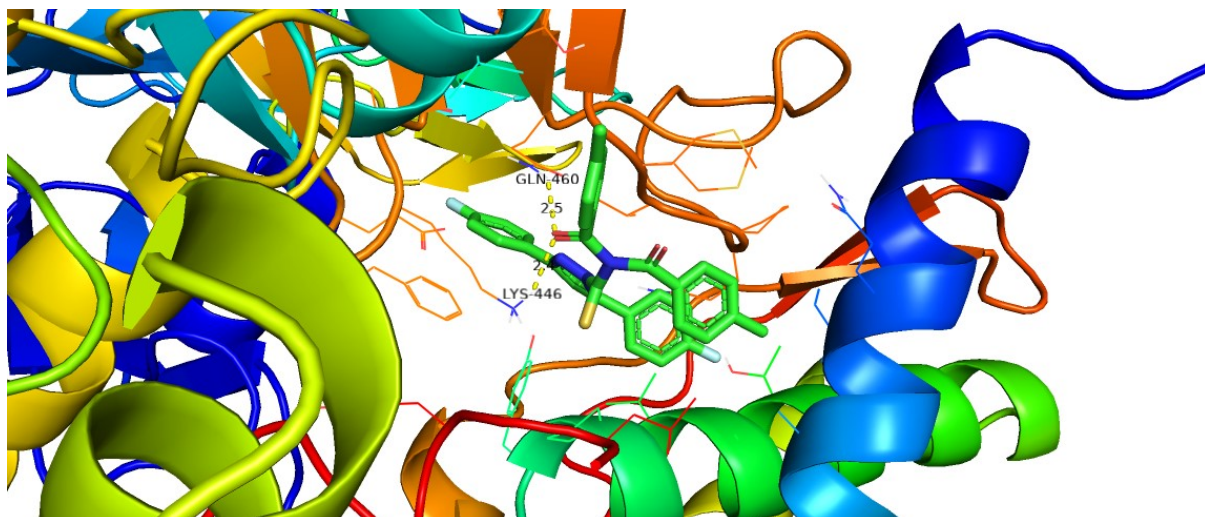

5a

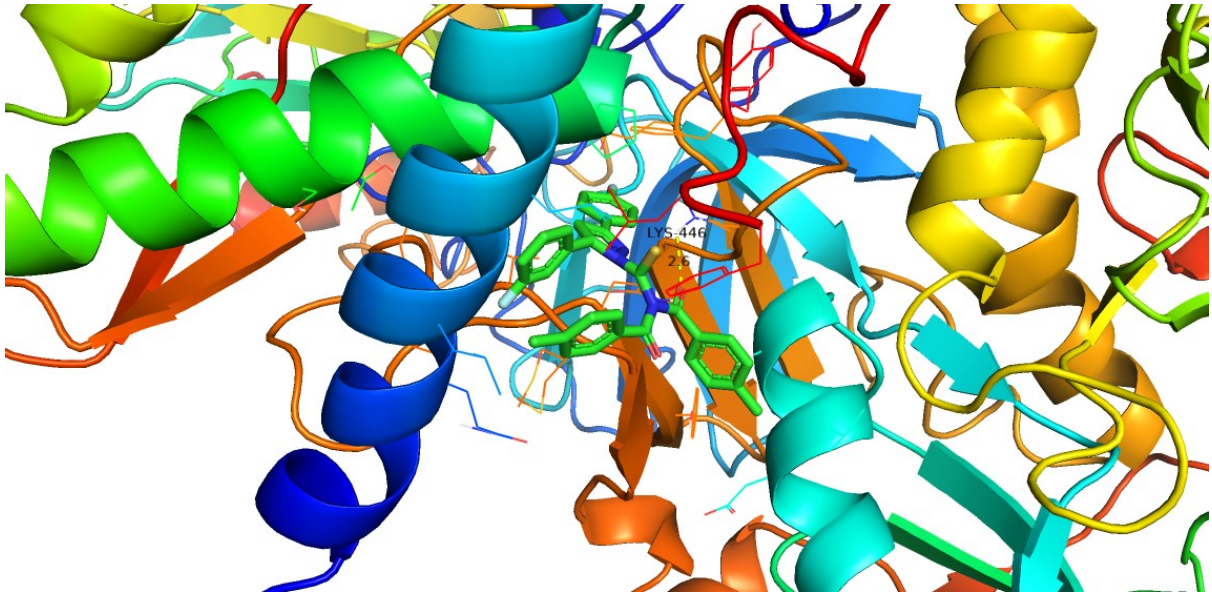

5b

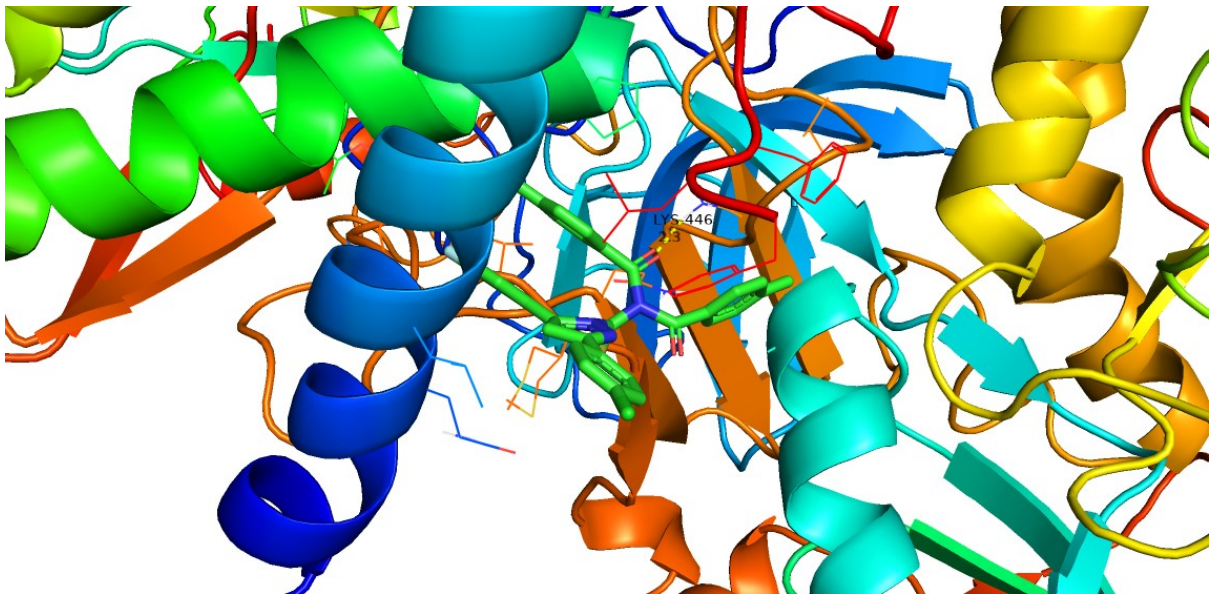

5c

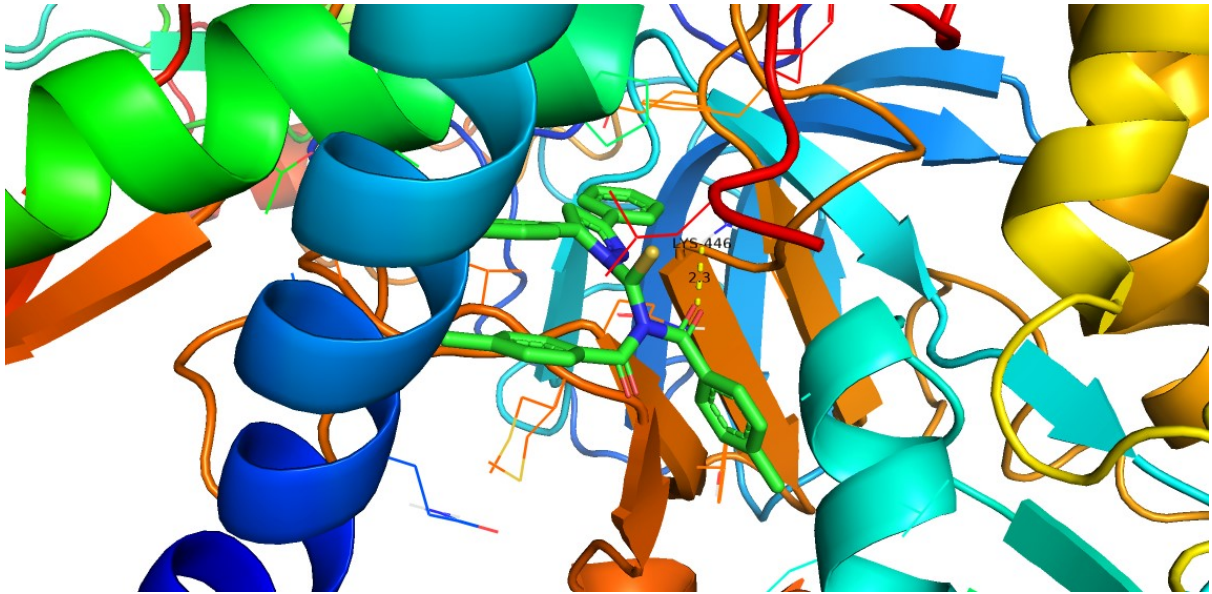

5d

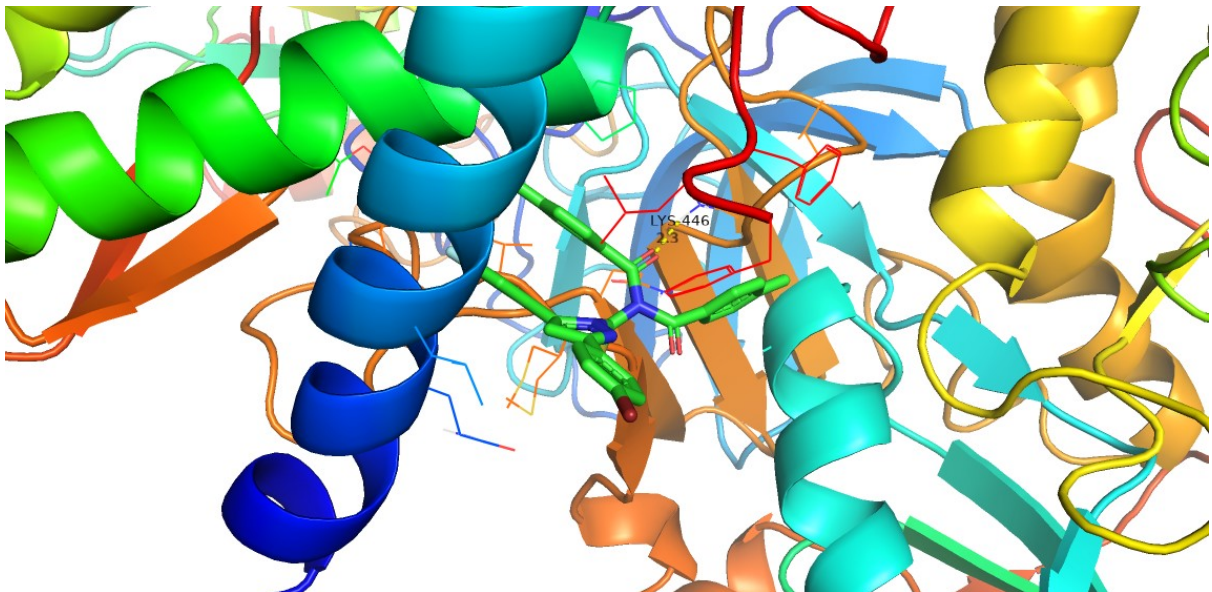

5e

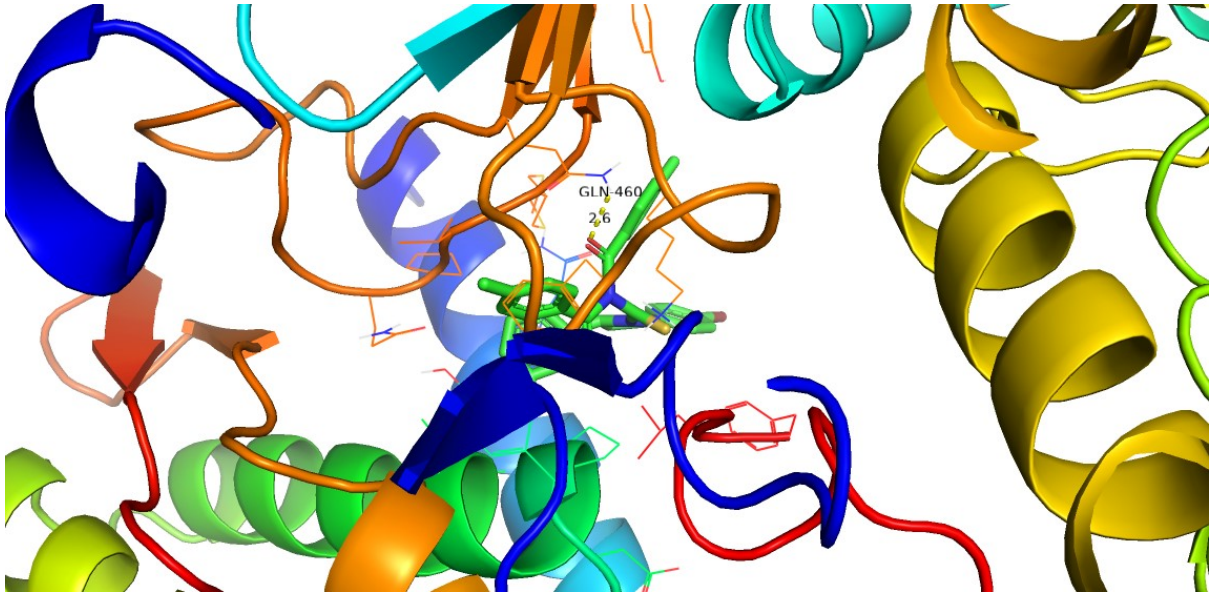

5f

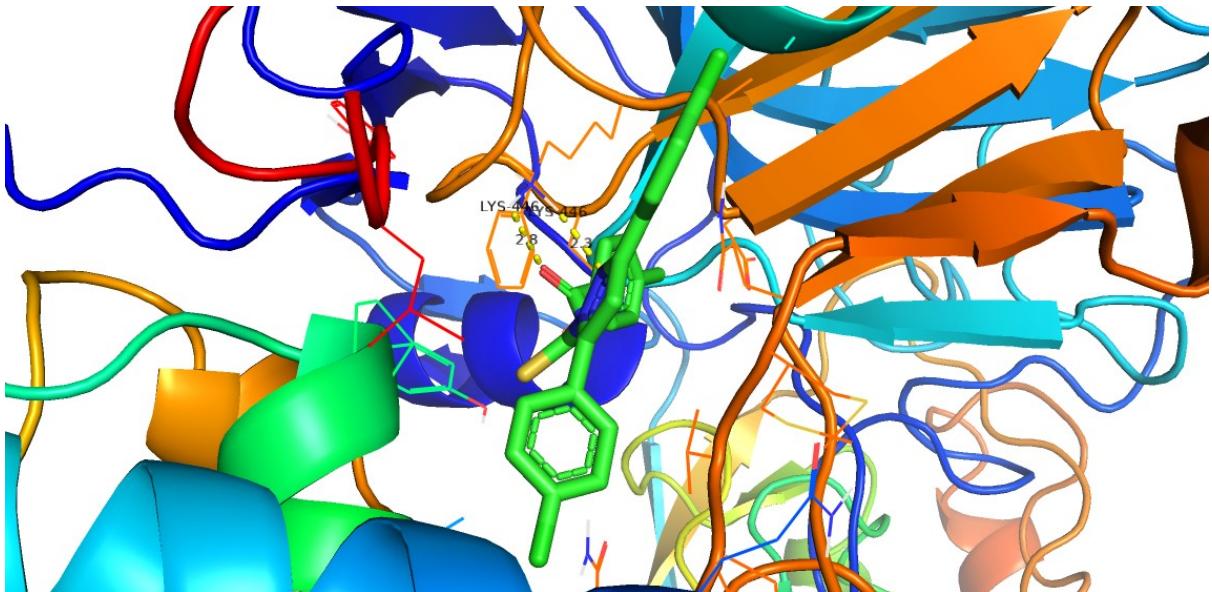

5g

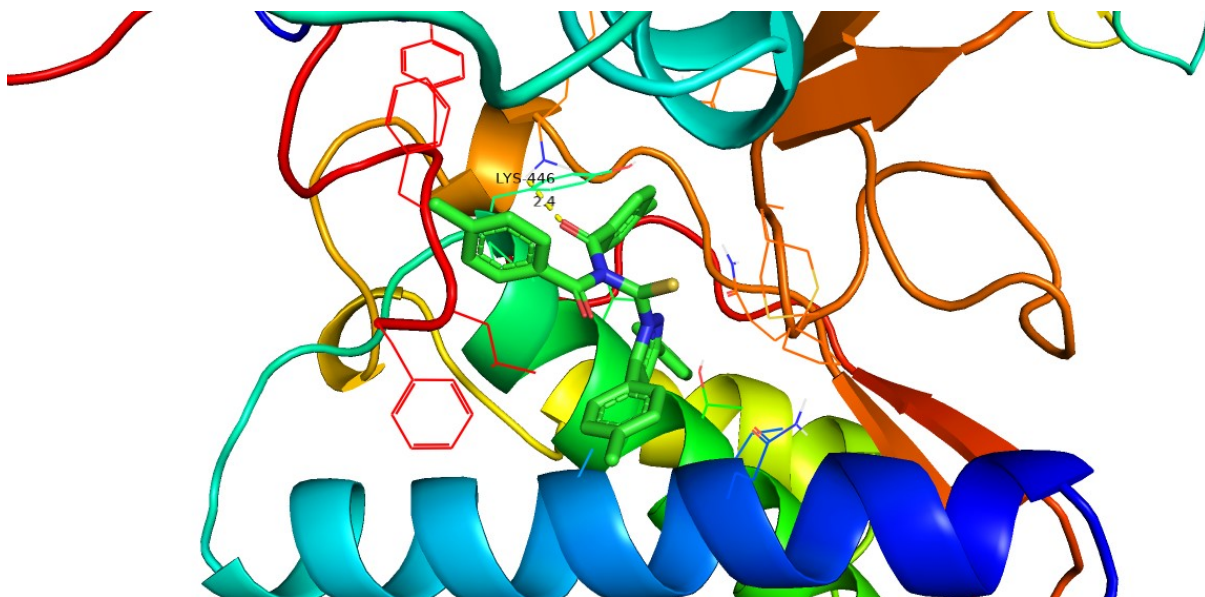

5h

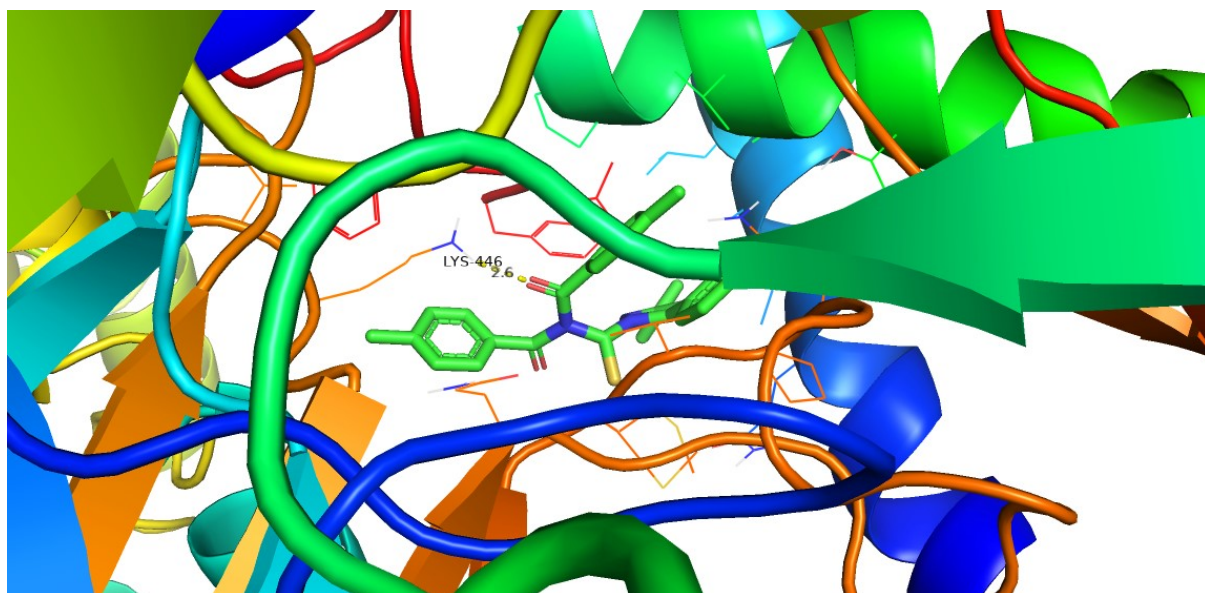

5i



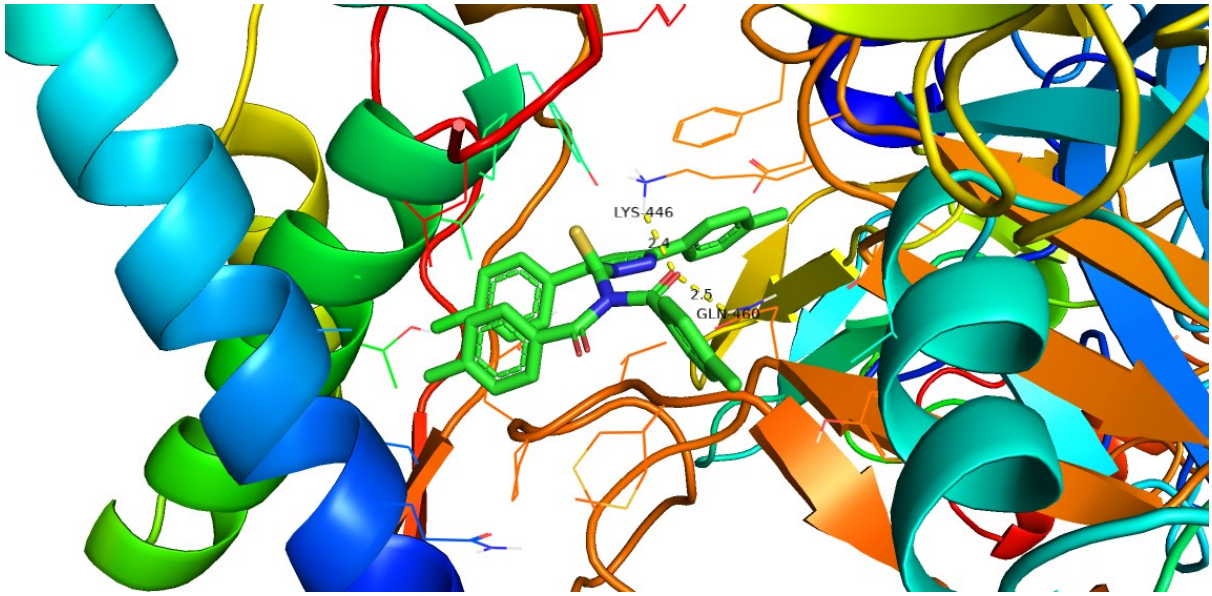

5j
